# Supplementary material
Source: publisher figshare collection journal article supplement (https://gsajournals.figshare.com/ndownloader/files/28950339)
Supplement: Supplementary file 1 [file 28950339]

## Sheet: TFs associated with tra1Q3 DEGs
Transcription Factor	% in user set	% in scerevisiae	p-value	Target ORF/Genes
Kar4p	0.3222	0.1452	0	PHO5 ADH5 RTC2 HMLALPHA1 GFD2 LEU2 YCL001W-A CIT2 YCR018C-A HSP30 MATALPHA1 YCR064C HMRA1 YCR097W-A PRR2 PST1 HSP42 YDR274C PHM6 YDR340W ARO10 DIT1 YDR442W MFA1 PAC11 YEL045C FCY2 ALD5 RAD51 SSA4 YER152C YER181C STE2 YFL019C HSP12 PES4 HXK1 IRC7 PAU11 YGL230C YGL204C YGL138C MF(ALPHA)2 AGA2 RME1 CLB6 BTN2 PHO81 ECM12 SPL2 ARO9 YHR140W RNR3 BAR1 REE1 OPT1 YJL118W SAG1 BNA2 TDA4 HMS2 BAT2 THI11 STE…
Gis1p	0.2088	0.1378	0	PHO5 YBR116C YBR285W PHO89 SPS22 CIT2 PAU3 YDL241W PRR2 NRG1 HSP42 DIT1 MFA1 PHO8 SSA4 SPI1 YER188W STE2 PAU5 HSP12 HXT10 PES4 PAU11 GPG1 SPR3 CTT1 FHN1 YHB1 YHR022C ANS1 YHR140W SGA1 RNR3 RGI2 BAR1 REE1 ANB1 PIR3 HAP4 CWP1 YKL050C MAE1 YKR075C ATG10 YLR012C ZRT2 PDC5 HUG1 HXT2 AAC1 SPG4 ALD3 SIP18 FET4 YGP1 MFA2 NRM1 ENB1 NDJ1 IZH4 GPD2 DDR2 LEU9 HSP33 YPL278C YPL277C ATP15 GRE1 GUP2 MRPL40 PDH1…
Ume6p	0.4278	0.1128	0	PHO5 YBR116C ADH5 YBR285W PHO89 CHA1 SPS22 GFD2 CIT2 YCR018C-A PAU3 THI13 YDL241W PRR2 YDL186W KNH1 STP4 YDR034C-A NRG1 PST1 UPS3 YDR340W DIT1 ALD5 MAM1 COM2 YER188W COS4 THI5 HSP12 HXT10 PES4 IRC7 YGL230C STR3 YGL138C RME1 SPR3 CTT1 CLB6 FHN1 YGR139W CYS4 RTS3 YHB1 RIE1 YGR269W YGR273C ERC1 SPL2 ARO9 YHR140W SPO16 PFS1 PHO12 IMD2 CSM2 YIL100W SGA1 RNR3 BAR1 MGA2 OPT1 ANB1 BNA2 HMS2 BAT2 THI11 PT…
Yhp1p	0.3247	0.1295	0	PHO5 LYS2 PHO89 CHA1 CIT2 YCR018C-A HSP30 MATALPHA2 HMRA1 YCR097W-A YDL241W KNH1 STP4 YDR034C-A NRG1 PST1 HSP42 YDR340W ARO10 DIT1 MFA1 PHO8 FCY2 VTC1 SSA4 MAM1 BUR6 STE2 HSP12 PES4 HXK1 MIG2 GPG1 AGA2 RME1 CTT1 CLB6 TPO2 YGR139W BTN2 RTS3 YHB1 RIE1 SPL2 SPO16 PHO12 SGA1 RNR3 RGI2 BAR1 OPT1 VTC4 BAT2 STE6 YKL177W HAP4 CWP1 MAE1 YLL066C ATG10 YLR012C PDC5 YLR297W CDA1 YLR311C ATG39 CIS1 PHO84 TSL1…
Gln3p	0.5696	0.0917	0	PHO5 LYS2 YBR116C ADH5 RTC2 YBR174C YBR285W HMLALPHA1 CHA1 LEU2 YCL001W-A CIT2 YCR018C-A HSP30 MATALPHA1 YCR041W YCR064C HMRA1 YCR097W-A PAU3 YDL241W PRR2 YDL186W NRG1 YDR157W UPS3 YDR274C PHM6 YDR340W ARO10 ATO3 YDR417C MFA1 PHO8 FCY2 ALD5 RAD51 SSA4 YER152C PET122 YER181C YER188W COS4 STE2 HSP12 PES4 PHO4 HXK1 YFR054C IRC7 YGL262W PAU11 ADE5,7 YGL230C MIG2 YGL204C STR3 TOS3 YGL138C GPG1 LIF1 MF…
Hac1p	0.4175	0.1111	0	PHO5 LYS2 ADH5 RTC2 PHO89 CHA1 SPS22 GFD2 YCR018C-A MATALPHA1 YCR041W YCR064C YCR102W-A PAU3 THI13 PRR2 YDL186W KNH1 STP4 YDR157W PHM6 ATO3 MFA1 PHO8 DSF1 YEL045C FCY2 ALD5 YER084W SSA4 COM2 SPI1 YER152C PET122 THI5 STE2 YFL019C HSP12 HXT10 HXK1 PAU11 YGL230C STR3 TOS3 YGL138C GPG1 YGL088W AGA2 ALK1 RME1 CTT1 TPO2 RTS3 YHB1 YGR269W YHR022C SLT2 ERC1 HXT4 ANS1 SPL2 YHR140W SPO16 PFS1 PHO12 SGA1 RG…
Hsf1p	0.4407	0.095	0	YAL064W PHO5 YBR116C ADH5 YBR285W PHO89 HMLALPHA1 CHA1 SPS22 YCL001W-A CIT2 HSP30 MATALPHA2 PRR2 STP4 NRG1 PST1 YDR157W HSP42 YDR274C PHM6 ARO10 ATO3 DIT1 MFA1 IZH1 YEL045C FCY2 VTC1 ALD5 SSA4 SPI1 STE2 HSP12 PHO4 HXK1 IRC7 ADE5,7 YGL230C STR3 YGL138C GPG1 MF(ALPHA)2 AGA2 RME1 CTT1 CLB6 BTN2 CYS4 RTS3 YHB1 RIE1 YGR259C TNA1 YGR265W YGR273C ANS1 SPL2 ARO9 YHR140W PHO12 IMD2 SGA1 RGI2 BAR1 MGA2 REE…
Gat4p	0.1907	0.1823	0	PHO5 YBR285W PHO89 HSP30 PAU3 THI13 YDL241W STP4 UPS3 ARO10 DIT1 SSA4 SPI1 STE2 PAU5 HSP12 HXT10 PES4 HXK1 PAU11 MIG2 TOS3 AGA2 CTT1 RTS3 YHB1 ARO9 YHR140W PHO12 SGA1 RNR3 BAR1 REE1 TDA4 STE6 PIR3 HAP4 CWP1 MAE1 YLR012C USB1 PDC5 PAU4 HXT2 AAC1 SRT1 SPG4 ALD3 HOR7 THI12 YGP1 NCE103 NDJ1 IZH4 SPO21 DDR2 PUT4 FDH1 HSP33 YPL278C YPL277C GUP2 PDR12 SRL4 HST2 YPR015C ATP20 SUE1 SSA1 PHO11 ECM13 CDS1 F…
Ixr1p	0.5361	0.0855	0	YAL064W PHO5 YBR116C ADH5 RTC2 YBR174C YBR285W PHO89 GFD2 YCR018C-A PET18 HSP30 MATALPHA2 PAU3 THI13 YDL241W STP4 YDR034C-A UPS3 PHM6 YDR340W ARO10 ATO3 DIT1 YDR442W MFA1 PHO8 PAC11 IZH1 DSF1 FCY2 ALD5 YER084W RAD51 SSA4 COM2 SPI1 YER152C YER188W THI5 GYP8 STE2 PAU5 YFL019C HSP12 PES4 HXK1 YFR054C IRC7 PAU11 ADE5,7 MIG2 YGL204C STR3 TOS3 AGA2 RME1 CTT1 TPO2 YGR139W CYS4 RTS3 PHO81 YHB1 TNA1 YGR26…
Bas1p	0.6649	0.0861	0	YAL064W PHO5 ADH5 RTC2 YBR285W PHO89 CHA1 SPS22 HBN1 LEU2 YCL001W-A CIT2 YCR018C-A MATALPHA1 HMRA1 PAU3 THI13 YDL186W KNH1 YDR034C-A NRG1 PST1 VTC5 HSP42 YDR274C PHM6 YDR340W ARO10 ATO3 DIT1 YDR417C MFA1 PHO8 DSF1 YEL045C VTC1 ALD5 SSA4 MAM1 COM2 SPI1 BUR6 YER181C YER188W COS4 THI5 PAU5 HSP12 HXT10 PES4 HXK1 IRC7 YGL262W ADE5,7 YGL230C TPN1 STR3 TOS3 YGL138C GPG1 LIF1 MF(ALPHA)2 YGL088W AGA2 ALK1…
Sok2p	0.5284	0.0895	0	YAL064W PHO5 LYS2 ADH5 RTC2 YBR285W PHO89 CHA1 LEU2 CIT2 YCR018C-A HSP30 THI13 YDL241W PRR2 KNH1 STP4 NRG1 PST1 VTC5 HSP42 ARO10 ATO3 DIT1 YDR442W PHO8 IZH1 DSF1 FCY2 ALD5 RAD51 SSA4 COM2 SPI1 YER152C PET122 YER188W COS4 THI5 GYP8 STE2 PAU5 HSP12 PES4 HXK1 IRC7 PAU11 MIG2 TOS3 GPG1 MF(ALPHA)2 AGA2 RME1 SPR3 CTT1 FHN1 TPO2 YGR139W RTS3 PHO81 YHB1 RIE1 YHR022C HXT4 TRA1 ANS1 SPL2 YHR140W PHO12 IMD2…
Rap1p	0.6186	0.0868	0	YAL064W PHO5 ADH5 RTC2 PHO89 HMLALPHA1 CHA1 GFD2 LEU2 CIT2 PET18 HSP30 MATALPHA2 MATALPHA1 HMRA1 YCR097W-A PAU3 YDL186W KNH1 STP4 NRG1 UPS3 YDR274C PHM6 ARO10 DIT1 YDR417C YDR442W MFA1 PHO8 PAC11 YEL045C FCY2 VTC1 ALD5 RAD51 SSA4 MAM1 COM2 YER152C YER188W COS4 GYP8 PAU5 HSP12 PES4 PHO4 HXK1 YFR054C YGL262W PAU11 ADE5,7 STR3 TOS3 GPG1 LIF1 AGA2 RME1 SPR3 CTT1 TPO2 YGR139W BTN2 CYS4 RTS3 PHO81 YHB1…
Crz1p	0.2912	0.1196	0	PHO5 RTC2 YBR285W PHO89 CHA1 LEU2 CIT2 YCR041W PAU3 YDL241W KNH1 NRG1 HSP42 ARO10 MFA1 PHO8 FCY2 ALD5 RAD51 COM2 SPI1 PET122 STE2 HSP12 HXK1 IRC7 MIG2 YGL138C AGA2 CTT1 TPO2 YGR139W BTN2 RTS3 YHB1 SLT2 HXT4 ARO9 YHR140W SGA1 RNR3 BAR1 ASG7 BNA2 TDA4 BAT2 STE6 PIR3 HAP4 CWP1 YKR075C YEH1 YLR012C YLR076C YLR162W ACO1 PHO84 YML122C TSL1 AIM34 PLB2 YMR007W HXT2 SPG4 GAT2 ALD3 SIP18 GTO3 HOR7 SCW10 YM…
Sfl1p	0.2758	0.1704	0	PHO5 LYS2 ADH5 PHO89 SPS22 LEU2 HSP30 MATALPHA2 PAU3 THI13 YDL241W NRG1 VTC5 YDR157W HSP42 YDR274C YDR340W ATO3 MFA1 DSF1 VTC1 ALD5 SSA4 MAM1 SPI1 THI5 HSP12 HXT10 YFR054C IRC7 ADE5,7 YGL204C TPN1 AGA2 RME1 CLB6 FHN1 BTN2 RIE1 YIL100W RNR3 BAR1 OPT1 ASG7 VTC4 YJR157W YKL177W PIR3 CWP1 YKR075C MTD1 YEH1 AFB1 SHM2 CDA1 CDA2 GAS2 CIS1 YLR446W HUG1 YMR013W-A SRT1 ADE17 SIP18 GTO3 HOR7 YMR304C-A SCW10…
Fhl1p	0.5103	0.1017	0	PHO5 YBR116C ADH5 RTC2 YBR285W HMLALPHA1 CHA1 GFD2 LEU2 CIT2 YCR018C-A PET18 HSP30 YCR064C HMRA1 YCR097W-A KNH1 STP4 NRG1 YDR157W HSP42 YDR274C PHM6 ATO3 DIT1 YDR417C MFA1 PHO8 PAC11 IZH1 DSF1 YEL045C FCY2 VTC1 ALD5 SSA4 COM2 SPI1 YER152C PET122 BUR6 STE2 HSP12 PES4 PHO4 HXK1 YGL230C MIG2 GPG1 LIF1 MF(ALPHA)2 AGA2 RME1 SPR3 CTT1 CLB6 TPO2 YGR139W BTN2 RTS3 PHO81 YGR269W ECM12 YHR022C SLT2 ERC1 HX…
Swi4p	0.3582	0.1017	1e-15	YAL064W PHO5 LYS2 PHO89 CHA1 GFD2 CIT2 HSP30 YCR064C HMRA1 YDL241W YDL186W STP4 PST1 HSP42 PHM6 YDR442W MFA1 DSF1 FCY2 ALD5 SSA4 SPI1 PET122 YER188W COS4 HSP12 HXT10 HXK1 IRC7 YGL230C STR3 TOS3 GPG1 AGA2 ALK1 RME1 CTT1 CLB6 FHN1 TPO2 YGR139W BTN2 PHO81 YHB1 RIE1 YHR022C SLT2 HXT4 SPL2 SPO16 PHO12 IMD2 YHR217C SGA1 RNR3 RGI2 BAR1 REE1 ASG7 YJL118W TDA4 HMS2 BAT2 THI11 STE6 PIR3 HAP4 CWP1 MAE1 YLL0…
Xbp1p	0.384	0.0972	2e-15	PHO5 HBN1 CIT2 HSP30 THI13 YDL241W STP4 NRG1 PST1 VTC5 HSP42 UPS3 PHM6 ARO10 ATO3 DIT1 YDR442W MFA1 PHO8 FCY2 ALD5 COM2 SPI1 YER152C PET122 COS4 THI5 STE2 HSP12 HXK1 PAU11 ADE5,7 YGL138C GPG1 AGA2 ALK1 RME1 CTT1 TPO2 BTN2 PHO81 YHB1 RIE1 TNA1 TRA1 ANS1 SPL2 ARO9 YHR140W SPO16 IMD2 SGA1 RNR3 RGI2 BAR1 REE1 ASG7 ANB1 BNA2 TDA4 HMS2 BAT2 THI11 STE6 PIR3 CWP1 YKR075C YEH1 AFB1 SHM2 PDC5 YLR297W ACO1 …
Gzf3p	0.1778	0.1468	2e-15	PHO5 LYS2 RTC2 HMLALPHA1 CIT2 YCR018C-A PET18 MATALPHA2 MATALPHA1 YCR041W YDL241W STP4 NRG1 HSP42 PHM6 ARO10 PHO8 SSA4 SPI1 HSP12 IRC7 TPN1 AGA2 ALK1 TPO2 BTN2 YHB1 ANS1 SPL2 ARO9 PHO12 PTK1 CWP1 YKR075C COX19 SHM2 PDC5 YLR297W ACO1 YLR416C AIM34 SIP18 RGM1 HOR7 FET4 YNL338W YGP1 CUZ1 AAH1 ENB1 IZH4 MCH5 FDH1 YPL278C ATP15 GUP2 SSU1 PDR12 ULP1 VTC3 SUE1 GPH1 SSA1 YAR066W PHO11 ECM13 FUI1 HSP26 AR…
Gcr2p	0.3454	0.1018	2e-15	YAL066W YAL064W PHO5 YBR116C ADH5 PHO89 CHA1 SPS22 GFD2 YCL001W-A CIT2 YCR097W-A PAU3 THI13 YDL241W STP4 NRG1 PST1 HSP42 PHM6 ATO3 YDR417C YEL045C ALD5 SPI1 YER152C PET122 BUR6 YER188W COS4 HSP12 HXK1 IRC7 YGL262W YGL230C MIG2 TPN1 AGA2 ALK1 CTT1 TPO2 YGR139W RTS3 TNA1 ECM12 YHR022C HXT4 SPL2 ARO9 YHR140W PHO12 IMD2 OPT1 ASG7 YJL169W ANB1 BNA2 TDA4 PTK1 STE3 PIR3 HAP4 YKR075C MTD1 USB1 PDC5 YLR28…
Rox1p	0.2706	0.1154	2e-15	ADH5 PHO89 HSP30 YCR064C HMRA1 PAU3 PRR2 KNH1 NRG1 PST1 HSP42 ATO3 DIT1 YDR442W DSF1 ALD5 SPI1 PET122 BUR6 YER181C THI5 PAU5 HSP12 HXK1 PAU11 ADE5,7 YGL230C MIG2 ALK1 CTT1 CLB6 BTN2 RTS3 YHB1 YGR265W SLT2 SPL2 ARO9 PFS1 YIL100W SGA1 RNR3 ASG7 VTC4 ANB1 BAT2 YJR157W STE6 HAP4 CWP1 YLR012C YLR297W ACO1 ATG39 VRP1 PAU4 HUG1 IMD4 PLB2 HXT2 SRT1 SPG4 GAT2 RGM1 HOR7 FET4 YNL338W THI12 CUZ1 NCE103 NRM1 …
Msn4p	0.5335	0.0835	4e-15	PHO5 LYS2 YBR116C YBR134W RTC2 YBR285W PHO89 HMLALPHA1 CHA1 SPS22 LEU2 CIT2 HSP30 YCR064C HMRA1 THI13 PRR2 KNH1 STP4 NRG1 PST1 VTC5 YDR157W HSP42 YDR274C PHM6 ARO10 ATO3 DIT1 YDR442W PAC11 IZH1 DSF1 YEL045C FCY2 YER066C-A ALD5 RAD51 SSA4 SPI1 BUR6 THI5 STE2 HSP12 PES4 PHO4 HXK1 YGL262W YGL230C STR3 YGL138C GPG1 AGA2 CTT1 TPO2 BTN2 CYS4 RTS3 YHB1 RIE1 TNA1 YGR269W ECM12 YHR022C ERC1 HXT4 SPL2 ARO9…
Mot3p	0.2629	0.115	6e-15	PHO5 CHA1 LEU2 CIT2 HSP30 PAU3 YDL241W STP4 PHM6 ARO10 ATO3 MFA1 PHO8 DSF1 VTC1 ALD5 BUR6 COS4 GYP8 STE2 PAU5 HSP12 HXK1 PAU11 AGA2 RME1 CLB6 BTN2 CYS4 YHB1 TNA1 YHR022C HXT4 SPL2 ARO9 YHR140W PHO12 IMD2 SGA1 RNR3 RGI2 BAR1 MGA2 REE1 ASG7 ANB1 STE6 HAP4 CWP1 MAE1 YEH1 SHM2 ZRT2 PDC5 YLR297W ACO1 GAS2 PAU4 TSL1 HUG1 AIM34 PLB2 HXT2 AAC1 YMR119W-A SIP18 YGP1 MFA2 AAH1 NCE103 PAU20 ENB1 NDJ1 IZH4 GP…
Skn7p	0.3119	0.1049	1e-14	YAL064W PHO5 LYS2 RTC2 YBR285W HMLALPHA1 LEU2 CIT2 YCR018C-A HSP30 MATALPHA1 YCR041W HMRA1 YCR097W-A YDL241W KNH1 STP4 NRG1 YDR157W HSP42 YDR442W MFA1 PAC11 YEL045C FCY2 ALD5 SSA4 SPI1 YER152C PET122 STE2 HSP12 PES4 HXK1 ADE5,7 STR3 GPG1 MF(ALPHA)2 AGA2 RME1 CTT1 TPO2 CYS4 RTS3 YHB1 SLT2 ANS1 PHO12 IMD2 YIL100W SGA1 RGI2 BAR1 ASG7 VTC4 SAG1 BNA2 HMS2 BAT2 STE3 YKL177W PIR3 HAP4 CWP1 YKR075C COX19…
Mig1p	0.1985	0.1323	1.4e-14	PHO5 RTC2 YBR285W PHO89 CIT2 HSP30 STP4 NRG1 HSP42 PHM6 ARO10 DIT1 YDR442W IZH1 DSF1 VTC1 ALD5 SPI1 THI5 HSP12 HXT10 HXK1 ADE5,7 AGA2 RME1 CTT1 YHR022C HXT4 SPL2 ARO9 YHR140W PHO12 SGA1 RNR3 RGI2 VTC4 BAT2 PIR3 HAP4 YKL031W MAE1 YLR162W YLR416C TSL1 AIM34 PLB2 HXT2 ALD3 RGM1 HOR7 TDA1 SCW10 YGP1 NCE103 NDJ1 IZH4 DDR2 HST3 YOR203W MCH5 HSP33 HSP82 GUP2 MF(ALPHA)1 RTC6 MRPL40 ATP4 PDR12 ECM23 VTC3 …
Yap6p	0.2758	0.1096	3.2e-14	YAL064W PHO5 YBR116C PHO89 YCR018C-A HSP30 MATALPHA2 MATALPHA1 YCR041W PRR2 STP4 NRG1 VTC5 PHM6 YDR442W DSF1 YEL045C FCY2 ALD5 SSA4 COM2 BUR6 HSP12 HXK1 ADE5,7 MIG2 TOS3 YGL138C GPG1 SPR3 CTT1 TPO2 RTS3 PHO81 YHB1 RIE1 YHR022C HXT4 SPL2 ARO9 PFS1 YIL100W SGA1 RGI2 MGA2 REE1 HMS2 BAT2 YJR157W STE6 PTK1 PIR3 HAP4 CWP1 MAE1 YKR075C MTD1 YEH1 SHM2 YLR297W ACO1 TSL1 HXT2 YMR013W-A ADE17 GAT2 ALD3 SIP1…
Hap4p	0.2964	0.1054	4.5e-14	PHO5 YBR116C YBR285W HMLALPHA1 CHA1 GFD2 YCR018C-A HSP30 MATALPHA2 MATALPHA1 YCR041W HMRA1 PAU3 THI13 YDL241W STP4 HSP42 UPS3 PHM6 ARO10 DIT1 MFA1 FCY2 RAD51 SPI1 YER152C THI5 HSP12 PES4 HXK1 MIG2 AGA2 ALK1 RME1 CLB6 YHB1 HXT4 ARO9 SPO16 IMD2 RNR3 RGI2 BAR1 MGA2 ASG7 BNA2 HMS2 BAT2 PIR3 HAP4 CWP1 MAE1 YLL066C AFB1 ZRT2 ACO1 ATG39 GAS2 YLR446W PAU4 TSL1 HUG1 PLB2 AAC1 SRT1 ADE17 ALD3 SCW10 FET4 YN…
Ste12p	0.7139	0.0724	6.6e-14	YAL066W YAL064W PHO5 YBR134W RTC2 YBR174C PHO89 CHA1 SPS22 HBN1 LEU2 CIT2 YCR018C-A PET18 HSP30 MATALPHA2 YCR064C YCR097W-A PAU3 YDL241W PRR2 YDL186W KNH1 STP4 YDR034C-A NRG1 PST1 VTC5 HSP42 YDR274C PHM6 YDR340W ARO10 ATO3 DIT1 YDR417C YDR442W MFA1 DSF1 YEL045C FCY2 VTC1 ALD5 YER084W RAD51 SSA4 MAM1 COM2 SPI1 BUR6 YER181C YER188W GYP8 STE2 PAU5 YFL019C HSP12 HXT10 PES4 PHO4 HXK1 YFR054C IRC7 YGL2…
Yox1p	0.2912	0.105	1.06e-13	YAL064W PHO5 YBR285W CHA1 HBN1 CIT2 YCR018C-A HSP30 PAU3 THI13 YDL241W PRR2 KNH1 STP4 YDR034C-A NRG1 PST1 HSP42 ARO10 DIT1 MFA1 FCY2 RAD51 SSA4 SPI1 BUR6 STE2 PAU5 HSP12 HXT10 PHO4 HXK1 MIG2 GPG1 AGA2 ALK1 RME1 CTT1 CLB6 TPO2 YGR139W RTS3 RIE1 PFS1 PHO12 YHR217C SGA1 RNR3 RGI2 BAR1 OPT1 ASG7 STE6 PIR3 HAP4 CWP1 YLL066C YLR012C YLR030W SHM2 YLR297W YLR416C PAU4 PLB2 HXT2 SRT1 SPG4 ADE17 GAT2 ALD3 …
Ndt80p	0.4742	0.0849	1.42e-13	YAL066W YAL064W PHO5 LYS2 YBR174C YBR285W PHO89 CHA1 SPS22 YCL001W-A YCR018C-A THI13 YDL241W PRR2 YDL186W KNH1 STP4 YDR034C-A NRG1 PST1 VTC5 YDR157W HSP42 YDR274C PHM6 ARO10 ATO3 DIT1 YDR442W MFA1 PHO8 DSF1 YEL045C FCY2 ALD5 YER084W MAM1 COM2 SPI1 BUR6 YER181C YER188W STE2 HSP12 HXT10 PES4 PHO4 HXK1 YGL230C TOS3 YGL138C GPG1 SPR3 CTT1 CLB6 TPO2 YGR139W BTN2 RTS3 PHO81 YHB1 YGR273C SPL2 ARO9 PFS1 …
Put3p	0.2397	0.1145	1.74e-13	ADH5 RTC2 HMLALPHA1 LEU2 MATALPHA1 YCR041W HMRA1 YCR097W-A PAU3 PHM6 MFA1 PAC11 DSF1 FCY2 ALD5 SPI1 YER152C STE2 HXT10 HXK1 MF(ALPHA)2 YGL088W AGA2 RME1 CLB6 CYS4 PHO81 YHB1 RIE1 HXT4 SPL2 ARO9 SPO16 IMD2 YIL100W RGI2 BAR1 YJL118W SAG1 TDA4 BAT2 STE6 STE3 YKL177W PIR3 CWP1 YLR030W AFB1 ZRT2 YLR311C ATG39 GAS2 YLR416C PHO84 HUG1 AIM34 PLB2 HXT2 AAC1 ADE17 ALD3 GTO3 YMR304C-A SCW10 FET4 ALF1 MFA2 A…
Sum1p	0.1985	0.1242	4.58e-13	PHO5 RTC2 PHO89 CHA1 SPS22 YDL186W HSP42 UPS3 PHM6 DIT1 MFA1 ALD5 MAM1 COS4 HSP12 HXT10 PES4 YGL230C YGL138C SPR3 YHB1 YGR259C TNA1 YGR273C ANS1 SPL2 PFS1 PHO12 YIL100W ANB1 BNA2 THI11 STE3 YKL177W CWP1 COX19 AFB1 CDA1 CDA2 ATG39 GAS2 YLR416C YMR119W-A ADE17 GAT2 ALD3 YMR304C-A SCW10 FET4 THI12 YGP1 YNL058C YNL034W YNL018C IZH4 SPO21 YOR203W SPR2 OSW1 MCH5 YOR385W FDH1 HSP82 MF(ALPHA)1 SPO19 TAF1…
Cat8p	0.0928	0.2034	5.46e-13	PHO5 HMLALPHA1 LEU2 CIT2 MATALPHA1 YDL241W KNH1 ARO10 ATO3 MFA1 STE2 PES4 MF(ALPHA)2 AGA2 ARO9 RGI2 BAR1 SAG1 HMS2 STE6 STE3 YKL177W HAP4 CWP1 AFB1 GAS2 TSL1 RKI1 PUT4 FDH1 MF(ALPHA)1 YPL062W REG2 YBR051W AAC3 SIP4
Aft1p	0.3041	0.0999	9.23e-13	PHO5 YBR116C PHO89 SPS22 CIT2 HSP30 PAU3 THI13 YDL186W VTC5 YDR157W HSP42 ARO10 YDR417C YEL045C YER066C-A SSA4 YER188W THI5 PAU5 HSP12 HXK1 YFR054C YGL262W PAU11 ADE5,7 GPG1 MF(ALPHA)2 YGL088W SPR3 FHN1 TPO2 BTN2 RTS3 YHB1 YGR259C HXT4 PHO12 IMD2 SGA1 RNR3 RGI2 YJL118W BNA2 TDA4 HMS2 THI11 STE3 PIR3 HAP4 MAE1 YKR075C YLR030W YLR149C-A YLR162W GAS2 CIS1 PAU4 HUG1 IMD4 HXT2 AAC1 SPG4 ADE17 ALD3 SIP…
Nrg1p	0.1701	0.1325	1.247e-12	YAL064W PHO5 RTC2 PHO89 YCR018C-A NRG1 DIT1 YDR442W MFA1 DSF1 YEL045C HSP12 HXK1 AGA2 CTT1 RTS3 YHR022C ERC1 PHO12 YIL100W SGA1 ASG7 YJR157W YKL177W HAP4 CWP1 YKR075C YLR012C YLR416C PHO84 YML122C AIM34 HXT2 AAC1 GAT2 HOR7 TDA1 FET4 YMR321C PPN2 NCE103 PAU20 ENB1 SDH5 RAS1 WTM2 MCH5 PUT4 ATP15 GUP2 RTC6 ATP4 PDR12 YPL034W YPL025C RMI1 ATP20 TPO3 QCR2 BDH1 LDS1 SSA1 ADE1 PHO11 ECM13 PRY1
Adr1p	0.2268	0.1127	2.338e-12	YBR116C HSP30 PRR2 VTC5 HSP42 PHM6 ARO10 ATO3 MFA1 IZH1 ALD5 SSA4 SPI1 YER152C STE2 HSP12 PHO4 HXK1 IRC7 AGA2 BTN2 RTS3 TRA1 SPL2 ARO9 YHR140W IMD2 RNR3 RGI2 REE1 ASG7 ANB1 BAT2 YKL177W PIR3 HAP4 YKR075C MTD1 PDC5 ATG39 CIS1 YLR366W YLR416C PAU4 TSL1 IMD4 HXT2 AAC1 SPG4 GAT2 ALD3 HOR7 TDA1 FET4 MFA2 AAH1 NCE103 ENB1 ZEO1 IZH4 GPD2 DDR2 LEU9 SER1 WTM2 PUT4 FDH1 HSP33 HSP82 MF(ALPHA)1 SSU1 YPL062W …
Msn2p	0.6237	0.0743	3.955e-12	YAL064W PHO5 LYS2 YBR116C YBR134W ADH5 RTC2 YBR285W PHO89 HMLALPHA1 CHA1 SPS22 HBN1 LEU2 CIT2 HSP30 HMRA1 YCR102W-A THI13 PRR2 KNH1 STP4 YDR034C-A NRG1 PST1 VTC5 HSP42 UPS3 PHM6 ARO10 ATO3 DIT1 YDR442W MFA1 PHO8 IZH1 DSF1 YEL045C FCY2 YER066C-A VTC1 ALD5 RAD51 SSA4 COM2 SPI1 PET122 BUR6 THI5 STE2 HSP12 PES4 PHO4 HXK1 IRC7 YGL262W ADE5,7 YGL230C MIG2 STR3 GPG1 AGA2 ALK1 RME1 CTT1 CLB6 TPO2 BTN2 CY…
Pho2p	0.2758	0.1005	1.1234e-11	PHO5 ADH5 PHO89 CHA1 CIT2 PET18 PAU3 THI13 STP4 VTC5 HSP42 PHM6 MFA1 PHO8 FCY2 VTC1 ALD5 SPI1 BUR6 HSP12 ADE5,7 TOS3 GPG1 AGA2 CTT1 TPO2 YGR139W PHO81 YHB1 RIE1 TNA1 ANS1 SPL2 ARO9 PHO12 ASG7 VTC4 BNA2 BAT2 THI11 YKL177W MAE1 MTD1 COX19 YEH1 AFB1 SHM2 YLR282C YLR297W ACO1 CDA1 GAS2 YLR446W PHO84 TSL1 HUG1 AIM34 HXT2 AAC1 YMR119W-A ADE17 SIP18 RGM1 HOR7 FET4 THI12 MER1 YGP1 MFA2 NCE103 AAD15 SPO21…
Rme1p	0.1959	0.1175	1.1984e-11	PHO5 YBR285W PHO89 GFD2 NRG1 HSP42 ARO10 DIT1 MFA1 ALD5 SSA4 SPI1 PAU5 HSP12 HXT10 TPN1 STR3 GPG1 AGA2 RME1 CTT1 BTN2 CYS4 RTS3 YHB1 ERC1 ARO9 YHR140W PHO12 SGA1 RNR3 REE1 ASG7 BAT2 HAP4 CWP1 COX19 YLR030W ZRT2 USB1 PDC5 YLR366W IMD4 PLB2 SPG4 FET4 YNL338W MFA2 NCE103 YNL034W YNL018C ENB1 ZEO1 IZH4 RAS1 LEU9 YOR203W SPR2 IRC13 YPL278C HSP82 GRE1 SPO19 SSU1 YPL034W YPR015C RDS3 GPH1 BDH1 SSA1 PHO1…
Tda9p	0.1005	0.1741	1.2383e-11	PHO5 PHO89 CIT2 YCR018C-A YDL241W PHM6 PHO8 GYP8 STE2 YFR054C AGA2 TPO2 TNA1 SPL2 PHO12 SGA1 BAR1 BAT2 SHM2 PLB2 YMR119W-A ADE17 GAT2 YMR304C-A SCW10 YMR321C YNL338W YNL058C NCE103 ENB1 ZEO1 YOR203W WTM2 HES1 MCH5 VTC3 SSA1 ADE1 PHO11
Sko1p	0.25	0.1046	1.2766e-11	YAL064W HBN1 LEU2 HSP30 PAU3 PRR2 KNH1 STP4 NRG1 VTC5 HSP42 MFA1 DSF1 SPI1 COS4 GYP8 STE2 HSP12 HXK1 PAU11 TPN1 STR3 TOS3 AGA2 CTT1 TPO2 YGR139W RTS3 RIE1 YHR022C HXT4 SPL2 ARO9 YHR140W SGA1 RGI2 BAR1 TDA4 HMS2 BAT2 PIR3 HAP4 CWP1 MAE1 YKR075C COX19 YLR297W GAS2 PAU4 TSL1 HXT2 GAT2 ALD3 SIP18 HOR7 TDA1 FET4 YMR321C ALF1 NCE103 NRM1 PAU20 ENB1 IZH4 GPD2 DDR2 SER1 YOR203W WTM2 PUT4 HSP33 GRE1 FLC1 …
Sut1p	0.2113	0.1123	1.8017e-11	PHO5 SPS22 GFD2 LEU2 HSP30 YDL241W PRR2 KNH1 NRG1 ARO10 FCY2 SPI1 YER152C HSP12 HXT10 GPG1 RME1 FHN1 RTS3 YHB1 RIE1 YHR022C ARO9 YHR140W PHO12 YIL100W SGA1 RNR3 RGI2 REE1 ASG7 ANB1 TDA4 PTK1 HAP4 CWP1 MAE1 COX19 SHM2 PDC5 YLR297W ACO1 ATG39 YLR416C TSL1 HUG1 HXT2 AAC1 GAT2 GTO3 HOR7 FET4 PPN2 YGP1 ALF1 AAH1 ENB1 IZH4 SDH5 RKI1 HES1 PUT4 FDH1 YPL277C ATP15 GUP2 RTC6 RRD2 SSU1 ATP4 HST2 CIP1 PDH1 A…
Yrr1p	0.4175	0.0846	2.0438e-11	PHO5 LYS2 ADH5 RTC2 PHO89 CHA1 SPS22 LEU2 CIT2 PET18 HSP30 YDL241W PRR2 YDL186W STP4 NRG1 PST1 VTC5 HSP42 PHM6 ARO10 ATO3 MFA1 PHO8 FCY2 ALD5 SSA4 SPI1 GYP8 STE2 HSP12 PHO4 HXK1 YGL262W ADE5,7 MIG2 TPN1 STR3 GPG1 AGA2 CTT1 CLB6 TPO2 YGR139W BTN2 CYS4 RTS3 YHB1 RIE1 TNA1 SLT2 HXT4 TRA1 ANS1 SPL2 ARO9 YHR140W PFS1 IMD2 SGA1 RGI2 BAR1 MGA2 OPT1 ASG7 YJL028W ANB1 BNA2 TDA4 HMS2 STE3 PIR3 HAP4 CWP1 MA…
Cin5p	0.4562	0.0812	4.9107e-11	YAL064W YBR116C ADH5 RTC2 YBR285W PHO89 HMLALPHA1 SPS22 HBN1 LEU2 HSP30 MATALPHA2 MATALPHA1 HMRA1 YCR097W-A PRR2 STP4 NRG1 VTC5 HSP42 PHM6 ARO10 YDR442W MFA1 DSF1 YEL045C FCY2 VTC1 ALD5 SSA4 SPI1 YER152C STE2 YFL019C HSP12 HXK1 PAU11 MIG2 TOS3 MF(ALPHA)2 YGL088W AGA2 RME1 CTT1 CLB6 FHN1 TPO2 BTN2 CYS4 RTS3 PHO81 YHB1 RIE1 YGR259C TNA1 YHR022C ERC1 HXT4 ANS1 SPL2 YHR140W PFS1 SGA1 RGI2 BAR1 OPT1 A…
Ino2p	0.3479	0.0896	4.9599e-11	PHO5 YBR134W PHO89 CIT2 YCR064C PAU3 KNH1 STP4 NRG1 HSP42 YDR274C PHM6 ATO3 DIT1 PAC11 IZH1 DSF1 FCY2 ALD5 RAD51 MAM1 COM2 YER152C GYP8 STE2 HSP12 HXT10 HXK1 MIG2 STR3 AGA2 CTT1 CLB6 FHN1 TPO2 BTN2 CYS4 RTS3 PHO81 YHB1 TNA1 ECM12 HXT4 SPL2 ARO9 PHO12 IMD2 SGA1 RNR3 RGI2 MGA2 ANB1 BNA2 TDA4 HMS2 BAT2 PIR3 HAP4 CWP1 YKR075C MTD1 YEH1 USB1 YLR297W YLR416C YLR446W PAU4 PHO84 TSL1 HUG1 PLB2 HXT2 YMR05…
Mig3p	0.3737	0.0869	6.7827e-11	YBR116C ADH5 PHO89 SPS22 GFD2 HBN1 CIT2 YCR018C-A HSP30 MATALPHA2 HMRA1 PAU3 THI13 YDL241W YDL186W STP4 NRG1 PST1 HSP42 ARO10 ATO3 DSF1 FCY2 ALD5 YER084W RAD51 SSA4 COM2 SPI1 YER152C BUR6 YER188W THI5 STE2 HSP12 HXK1 IRC7 PAU11 ADE5,7 MIG2 TPN1 STR3 YGL088W RME1 CTT1 TPO2 YGR139W RTS3 RIE1 TNA1 ANS1 SPL2 ARO9 YHR140W PHO12 YHR217C YIL100W RNR3 OPT1 ASG7 ANB1 HMS2 BAT2 THI11 YKL177W HAP4 CWP1 YKL0…
Tec1p	0.6881	0.0699	1.04456e-10	YAL066W YAL064W PHO5 YBR116C YBR134W RTC2 YBR174C YBR285W PHO89 CHA1 SPS22 CIT2 YCR018C-A HSP30 YCR041W YCR064C YDL241W PRR2 YDL186W KNH1 STP4 YDR034C-A NRG1 PST1 HSP42 UPS3 YDR274C PHM6 YDR340W ARO10 ATO3 YDR417C YDR442W MFA1 PHO8 PAC11 YEL045C FCY2 YER066C-A VTC1 ALD5 SSA4 MAM1 SPI1 PET122 BUR6 YER181C YER188W COS4 STE2 YFL019C HSP12 HXT10 PES4 PHO4 HXK1 YFR054C IRC7 YGL262W YGL230C MIG2 YGL204…
Mcm1p	0.3711	0.0862	1.54806e-10	PHO5 YBR134W ADH5 PHO89 CHA1 CIT2 YCR018C-A HSP30 MATALPHA2 HMRA1 STP4 YDR034C-A PST1 HSP42 YDR340W DIT1 YDR442W MFA1 PHO8 YEL045C FCY2 YER066C-A RAD51 COM2 SPI1 YER152C BUR6 COS4 GYP8 STE2 HSP12 ADE5,7 MIG2 MF(ALPHA)2 AGA2 ALK1 TPO2 YGR139W CYS4 RTS3 RIE1 YHR022C HXT4 TRA1 ARO9 PHO12 IMD2 CSM2 RNR3 RGI2 BAR1 OPT1 ASG7 YJL169W VTC4 SAG1 ANB1 HMS2 BAT2 STE6 PTK1 STE3 PIR3 HAP4 CWP1 MAE1 YKR075C YL…
Ace2p	0.1959	0.1105	2.52648e-10	ADH5 HMLALPHA1 LEU2 YCR018C-A MATALPHA1 YCR041W HMRA1 YCR097W-A YDR034C-A PST1 YDR157W YDR340W MFA1 PHO8 FCY2 ALD5 YER152C PET122 COS4 STE2 ADE5,7 TOS3 MF(ALPHA)2 AGA2 RME1 CYS4 YHB1 RIE1 YGR259C TNA1 ERC1 IMD2 BAR1 REE1 OPT1 SAG1 HMS2 BAT2 STE6 STE3 YKL177W PIR3 CWP1 AFB1 GAS2 YLR366W YLR416C PHO84 TSL1 IMD4 PLB2 HXT2 ADE17 ENB1 ZEO1 NDJ1 YOL013W-A WTM2 HES1 MCH5 ATP15 YPL225W MF(ALPHA)1 RTC6 SP…
Ifh1p	0.1392	0.1277	6.49192e-10	PHO5 ADH5 HMLALPHA1 CHA1 PHM6 ATO3 YDR417C MFA1 PHO8 ALD5 SSA4 COM2 PET122 STE2 HSP12 MF(ALPHA)2 AGA2 TPO2 ECM12 HXT4 SPL2 CSM2 SAG1 BNA2 HMS2 STE3 PIR3 YLR030W AFB1 GAS2 YLR366W YLR446W IMD4 PLB2 SPG4 RPL18B PPN2 MFA2 IZH4 RKI1 SER1 YOR203W IRC13 MF(ALPHA)1 YPL080C VTC3 PHO11 FMP23 HSP26 AAC3 ARG3 LYS20 YGL188C-A YMR242W-A
Sfp1p	0.6082	0.0719	6.63572e-10	PHO5 LYS2 YBR116C ADH5 RTC2 YBR285W PHO89 CHA1 LEU2 CIT2 PET18 HSP30 MATALPHA2 MATALPHA1 HMRA1 YCR097W-A YDL241W PRR2 KNH1 NRG1 YDR157W HSP42 UPS3 PHM6 ATO3 DIT1 YDR417C MFA1 PHO8 PAC11 IZH1 FCY2 VTC1 ALD5 RAD51 SSA4 SPI1 YER152C PET122 BUR6 YER188W GYP8 STE2 PAU5 HSP12 HXT10 PES4 PHO4 HXK1 YGL262W ADE5,7 YGL204C TPN1 STR3 TOS3 GPG1 AGA2 ALK1 RME1 CTT1 TPO2 BTN2 CYS4 RTS3 PHO81 YHB1 RIE1 YGR259C …
Hot1p	0.0593	0.2233	7.44089e-10	YBR116C CHA1 LEU2 SPI1 HSP12 CTT1 BTN2 YHR140W BNA2 PHO84 TSL1 SPG4 ALD3 SIP18 HOR7 YGP1 NCE103 PUT4 GRE1 FLC1 SSA1 HSP26 SIP4
Ino4p	0.3814	0.0833	9.70779e-10	YAL066W YAL064W PHO5 ADH5 PHO89 HMLALPHA1 SPS22 LEU2 CIT2 MATALPHA1 YCR064C PAU3 THI13 KNH1 STP4 YDR157W YDR274C PHM6 ATO3 DIT1 IZH1 DSF1 FCY2 MAM1 YER152C PET122 BUR6 COS4 HSP12 HXT10 PES4 PHO4 HXK1 IRC7 YGL230C MIG2 STR3 YGL088W SPR3 CTT1 FHN1 TPO2 CYS4 RTS3 PHO81 YHB1 RIE1 TNA1 YGR273C HXT4 SPL2 ARO9 SPO16 PFS1 IMD2 SGA1 RNR3 RGI2 BAR1 MGA2 YJL118W ANB1 HMS2 BAT2 STE3 CWP1 YLR012C USB1 YLR297W…
Spt23p	0.3892	0.0826	1.08954e-09	YAL066W LYS2 YBR134W PHO89 HMLALPHA1 CHA1 SPS22 CIT2 YCR018C-A HSP30 MATALPHA2 MATALPHA1 HMRA1 THI13 YDL241W PRR2 STP4 NRG1 PST1 HSP42 YDR274C YDR340W ARO10 ATO3 YDR417C IZH1 YEL045C FCY2 VTC1 ALD5 SSA4 COM2 SPI1 YER181C COS4 THI5 STE2 YFL019C HXT10 PHO4 IRC7 ADE5,7 TOS3 MF(ALPHA)2 YGL088W SPR3 CTT1 CLB6 FHN1 TPO2 BTN2 CYS4 RTS3 YHB1 RIE1 SLT2 IMD2 YHR217C YIL100W SGA1 RNR3 BAR1 MGA2 ASG7 SAG1 BN…
Rds2p	0.1649	0.1139	2.19614e-09	ADH5 PHO89 HMLALPHA1 LEU2 HSP30 MATALPHA1 HMRA1 YCR097W-A PRR2 KNH1 STP4 HSP42 PHM6 ARO10 ATO3 MFA1 ALD5 SPI1 STE2 GPG1 MF(ALPHA)2 AGA2 RME1 CYS4 RTS3 RIE1 TNA1 SLT2 SPL2 IMD2 RGI2 BAR1 SAG1 TDA4 BAT2 STE6 STE3 YKL177W HAP4 MAE1 YKR075C AFB1 SHM2 GAS2 HXT2 ADE17 HOR7 FET4 ZEO1 DDR2 PLB3 PUT4 YPL225W MF(ALPHA)1 RTC6 SSU1 SKS1 RMI1 ATP20 ECM13 REG2 SIP4 YGL007C-A SPO24
Gat3p	0.1778	0.1099	2.37093e-09	PHO5 HMLALPHA1 HSP30 MATALPHA2 MATALPHA1 YCR041W HMRA1 PAU3 THI13 YDL241W PST1 HSP42 ARO10 DIT1 ALD5 SSA4 COS4 STE2 PAU5 HSP12 HXT10 PAU11 AGA2 CTT1 BTN2 CYS4 RTS3 YHB1 RIE1 ARO9 SGA1 RNR3 BAR1 HAP4 YLL066C ATG10 YLR012C ACO1 GAS2 PAU4 TSL1 HOR7 YMR321C YNL338W THI12 YGP1 AAH1 NCE103 YOL166C AAD15 IZH4 DDR2 RKI1 SER1 WTM2 FDH1 HSP33 HSP82 MF(ALPHA)1 RRD2 YPR015C ATP20 ROX1 ARR2 ADE1 ECM13 CDS1 YR…
Flo8p	0.2423	0.0961	3.27585e-09	YAL064W PHO5 ADH5 PHO89 GFD2 LEU2 YCL001W-A HSP30 YDL241W KNH1 STP4 PST1 HSP42 PHM6 ATO3 PHO8 FCY2 VTC1 ALD5 SPI1 BUR6 COS4 THI5 PHO4 YGL262W MIG2 STR3 AGA2 SPR3 TPO2 YGR139W RIE1 SPL2 ARO9 CSM2 RGI2 OPT1 ANB1 THI11 YJR157W PTK1 HAP4 YLR012C YLR030W AFB1 SHM2 YLR297W ATG39 YLR446W TSL1 PLB2 HXT2 AAC1 GAT2 GTO3 HOR7 YMR306C-A FET4 THI12 RPL18B PPN2 YGP1 CUZ1 YNL034W YNL018C ENB1 ZEO1 NDJ1 IZH4 DDR…
Mbp1p	0.25	0.0949	3.40171e-09	RTC2 CHA1 YCR018C-A HSP30 YCR064C KNH1 NRG1 HSP42 DIT1 YDR442W MFA1 VTC1 RAD51 SPI1 BUR6 COS4 THI5 HSP12 HXT10 GPG1 AGA2 ALK1 CLB6 FHN1 BTN2 RTS3 SPO16 PHO12 YHR217C YJL118W ANB1 BAT2 PTK1 PIR3 CWP1 MAE1 YLL066C COX19 YLR030W USB1 PDC5 YLR297W ACO1 YLR366W TSL1 HUG1 AIM34 PLB2 YMR007W ALD3 HOR7 TDA1 YMR304C-A SCW10 YMR306C-A FET4 YNL338W THI12 YGP1 CUZ1 ALF1 NRM1 NDJ1 IZH4 SDH5 DDR2 WTM2 YOR385W …
Hap1p	0.1727	0.1104	3.4078e-09	PHO89 GFD2 YDL241W PRR2 KNH1 STP4 NRG1 ATO3 IZH1 DSF1 FCY2 HSP12 HXT10 CTT1 TPO2 PHO81 YHB1 YHR022C SGA1 RGI2 ANB1 BNA2 PIR3 HAP4 CWP1 YKR075C YEH1 TSL1 HUG1 HXT2 AAC1 GAT2 GTO3 HOR7 FET4 YNL338W YGP1 CUZ1 AAH1 ZEO1 IZH4 GPD2 DDR2 RKI1 ATG40 PUT4 GRE1 GUP2 PDR12 SKS1 RMI1 YPR015C ROX1 SUE1 QCR2 BDH1 ECM13 FUI1 REG2 HSP26 SIP4 COQ21 LYS20 YER053C-A YGL007C-A SPO24 YPR145C-A
Zap1p	0.1495	0.116	6.45574e-09	PHO5 ADH5 YBR285W PHO89 HMLALPHA1 CHA1 LEU2 MATALPHA2 MATALPHA1 YCR041W HMRA1 PAU3 YDL241W KNH1 PST1 IZH1 ALD5 COS4 HSP12 GPG1 AGA2 CTT1 YHB1 SPL2 ARO9 RGI2 TDA4 BAT2 YKL177W PIR3 CWP1 ZRT2 USB1 ATG39 YMR007W HXT2 ADE17 ALD3 FET4 YNL338W YGP1 ALF1 AAH1 NCE103 YNL018C DDR2 PUT4 FDH1 HSP33 HSP82 MF(ALPHA)1 RMI1 PDH1 YPR015C BDH1 HSP26 AAC3 PRY1
Rfx1p	0.2139	0.098	1.34927e-08	PHO89 HMLALPHA1 CIT2 MATALPHA2 PAU3 YDL241W YDL186W KNH1 HSP42 PHM6 ARO10 DSF1 FCY2 VTC1 RAD51 SSA4 SPI1 YER152C HSP12 HXT10 HXK1 PAU11 STR3 TOS3 BTN2 RTS3 YHR022C TRA1 SPL2 ARO9 SPO16 PHO12 CSM2 RNR3 RGI2 MGA2 REE1 YJL028W BAT2 PIR3 YEH1 ACO1 GAS2 CIS1 PAU4 TSL1 HUG1 PLB2 YMR013W-A SRT1 ALD3 TDA1 YMR321C RPL18B MER1 ALF1 AAD15 PAU20 IZH4 DDR2 SPR2 WTM2 FDH1 HSP33 YPL278C ATP15 HSP82 GUP2 POS5 MF…
Rof1p	0.0954	0.1429	1.39478e-08	GFD2 HSP30 YDR157W HSP42 ATO3 IZH1 VTC1 ALD5 SSA4 CLB6 BTN2 RIE1 YGR259C YIL100W RGI2 ASG7 ANB1 YKL031W CIS1 YLR416C YLR446W YMR007W HXT2 SRT1 GTO3 YGP1 NRM1 YOL013W-A YOR385W FDH1 HSP82 YPL062W ECM23 AEP3 SSA1 YRO2 YPR145C-A
Phd1p	0.1985	0.1008	1.41758e-08	YAL064W PHO89 HMLALPHA1 LEU2 YCR018C-A MATALPHA1 YCR064C HMRA1 YCR097W-A PRR2 KNH1 STP4 ATO3 YDR442W MFA1 DSF1 ALD5 COM2 SPI1 PET122 COS4 STE2 STR3 TOS3 MF(ALPHA)2 AGA2 YGR139W PHO81 RIE1 CSM2 YIL100W SGA1 RGI2 BAR1 REE1 SAG1 TDA4 BAT2 THI11 YJR157W STE6 PTK1 STE3 YKL177W HAP4 YLL066C YLR030W AFB1 ATG39 GAS2 HXT2 SRT1 GAT2 HOR7 YMR304C-A SCW10 FET4 YOL166C PAU20 ZEO1 DDR2 RKI1 RAS1 LAS17 WTM2 MF(…
Upc2p	0.1289	0.1205	2.04955e-08	YAL064W PHO5 CIT2 PAU3 NRG1 HSP42 PHO8 DSF1 SSA4 SPI1 YER188W PAU5 HXT10 PAU11 GPG1 FHN1 ARO9 SPO16 PHO12 SGA1 RNR3 ANB1 PIR3 YLR297W YLR366W PAU4 AIM34 ALD3 HOR7 NCE103 YNL018C NRM1 PAU20 NDJ1 HES1 MCH5 FDH1 HSP33 YPL278C GUP2 ROX1 SUE1 HDA3 YPR196W PHO11 FUR4 YRO2 HSP26 SIP4 PRY1
Stp1p	0.2165	0.0967	2.0803e-08	PHO5 PHO89 CHA1 LEU2 YCR018C-A PET18 HSP30 YDL241W NRG1 HSP42 PHM6 ARO10 ATO3 PHO8 YEL045C ALD5 SPI1 COS4 YFR054C STR3 GPG1 AGA2 CLB6 TPO2 CYS4 RTS3 YHB1 ERC1 SPL2 ARO9 YHR140W PHO12 YHR217C SGA1 OPT1 ASG7 BNA2 HMS2 BAT2 THI11 PTK1 YKL177W YKL031W MAE1 ZRT2 CIS1 YLR416C PHO84 YML122C TSL1 IMD4 YMR007W SRT1 SPG4 GAT2 YMR304C-A SCW10 YMR321C PPN2 YGP1 YNL058C ENB1 ATG40 HES1 MCH5 YOR385W TAF14 SSU1…
Hap5p	0.134	0.1182	2.09422e-08	HMLALPHA1 LEU2 YCR018C-A MATALPHA1 YCR041W YDR274C ATO3 MFA1 GYP8 STE2 PES4 ADE5,7 MF(ALPHA)2 AGA2 CYS4 YHB1 PHO12 RNR3 BAR1 SAG1 BNA2 TDA4 HMS2 THI11 STE6 STE3 YKL177W PIR3 AFB1 SHM2 GAS2 HUG1 PLB2 YMR057C ADE17 HOR7 YNL338W THI12 YNL285W SPO21 LAS17 HES1 ATP15 HSP82 GUP2 MF(ALPHA)1 VTC3 YPR015C ATP20 QCR2 YAR053W ECM13
Cup2p	0.1933	0.1008	2.22636e-08	PHO5 RTC2 CHA1 CIT2 HSP30 KNH1 STP4 PST1 PHM6 DSF1 FCY2 VTC1 RAD51 SPI1 HSP12 HXT10 HXK1 AGA2 ALK1 CTT1 CLB6 FHN1 TPO2 YGR139W YHB1 RIE1 YHR022C HXT4 SPL2 YHR140W SPO16 RGI2 BAR1 BAT2 HAP4 CWP1 COX19 USB1 PDC5 YLR297W ACO1 ATG39 PHO84 TSL1 AIM34 PLB2 HXT2 GAT2 HOR7 FET4 YGP1 AAH1 NRM1 NDJ1 IZH4 DDR2 PUT4 ATP15 FLC1 RTC6 MGR2 ECM23 HST2 CIP1 PDH1 GPH1 SSA1 YAR066W ECM13 YPK3 CDS1 YRO2 AAC3 ARG3 PR…
Yap5p	0.2165	0.0951	4.40529e-08	YBR116C HMLALPHA1 GFD2 CIT2 YCR018C-A HSP30 MATALPHA2 MATALPHA1 YCR041W PAU3 PRR2 YDR034C-A YDR157W PHM6 YDR340W ATO3 DIT1 YDR442W MFA1 VTC1 ALD5 RAD51 MAM1 COS4 PAU5 HSP12 HXT10 PES4 ADE5,7 AGA2 CTT1 TPO2 YGR139W YHB1 ANS1 SPL2 SGA1 RNR3 BAR1 ASG7 YKL177W PIR3 MTD1 YLL066C SHM2 YLR162W YLR297W CIS1 PAU4 AAC1 SRT1 SPG4 ADE17 ALD3 SIP18 YNL338W MFA2 AAH1 YNL058C IZH4 DDR2 YOL013W-A HST3 LEU9 SER1 …
Hms1p	0.2655	0.0874	8.92234e-08	YBR134W ADH5 YBR285W PHO89 HMLALPHA1 LEU2 CIT2 YCR018C-A PET18 HSP30 MATALPHA1 YCR041W HMRA1 YCR097W-A PAU3 THI13 YDL241W HSP42 PHM6 DIT1 MFA1 SSA4 YER152C COS4 THI5 GYP8 STE2 PAU5 PES4 PAU11 STR3 GPG1 MF(ALPHA)2 AGA2 RME1 CLB6 BTN2 CYS4 RTS3 YHB1 YGR259C SPL2 ARO9 SPO16 PHO12 IMD2 RNR3 BAR1 REE1 ASG7 YJL118W SAG1 TDA4 HMS2 BAT2 STE6 STE3 YKL177W PIR3 HAP4 AFB1 USB1 PDC5 ACO1 ATG39 GAS2 CIS1 PAU4…
YPR015C	0.116	0.121	9.04154e-08	YBR285W CHA1 PAU3 STP4 NRG1 HSP42 PAU5 PAU11 TOS3 GPG1 AGA2 YHB1 ARO9 SGA1 RNR3 BAR1 HAP4 CWP1 ATG10 YEH1 TSL1 ALD3 HOR7 RPL18B PPN2 YGP1 CUZ1 NCE103 PAU20 ENB1 NDJ1 DDR2 PUT4 ATP15 GUP2 MRPL40 PDH1 ATP20 ATG11 SUE1 ECM13 YRO2 HSP26 ARG3 PRY1
Met4p	0.1701	0.1022	1.01469e-07	PHO5 YBR116C ADH5 HSP30 MATALPHA2 HMRA1 KNH1 STP4 PST1 ARO10 ALD5 RAD51 SPI1 STE2 HSP12 STR3 ALK1 CTT1 CLB6 BTN2 CYS4 YHB1 YHR022C SPL2 ARO9 SPO16 PHO12 RGI2 BAR1 OPT1 BAT2 PIR3 HAP4 CWP1 PHO84 HUG1 AIM34 PLB2 HXT2 GAT2 ALD3 RGM1 HOR7 PPN2 YGP1 CUZ1 MFA2 AAH1 YNL017C NRM1 AAD15 ENB1 ZEO1 NDJ1 SPO21 DDR2 PLB3 RKI1 LEU9 HSP33 ATP20 ROX1 ECM13 CDS1 ZTA1 YRO2
Rtg1p	0.0954	0.1307	1.55913e-07	PHO5 PHO89 CIT2 YCR018C-A KNH1 NRG1 PHM6 ATO3 MFA1 PAC11 YEL045C ALD5 STE2 AGA2 FHN1 HXT4 SPL2 ARO9 PHO12 IMD2 YHR217C HAP4 YKR075C ACO1 CIS1 PHO84 HXT2 AAH1 IZH4 MCH5 HSP82 SKS1 PDH1 YAR053W PHO11 FUI1 IRC18
Stp2p	0.1521	0.1055	1.59597e-07	PHO89 PET18 MATALPHA2 MATALPHA1 YCR041W YDL241W NRG1 HSP42 ARO10 ATO3 SPI1 STE2 GPG1 AGA2 CLB6 RTS3 ERC1 SPL2 ARO9 YHR140W PHO12 SGA1 ASG7 SAG1 BNA2 HMS2 BAT2 THI11 YKL177W CWP1 YKL031W YLR297W CIS1 YLR416C PHO84 YMR007W SRT1 SPG4 TDA1 YMR321C PPN2 YGP1 ATG40 WTM2 HES1 TAF14 SSU1 YPL062W SRL4 VTC3 GPH1 ADE1 PHO11 FIG1 GIP1 FMP23 HSP26 AAC3 IRC18
Gcr1p	0.3351	0.0804	1.74336e-07	PHO5 YBR116C YBR134W ADH5 RTC2 PHO89 CHA1 SPS22 CIT2 HSP30 MATALPHA2 YCR064C HMRA1 YDR157W YDR274C YDR417C VTC1 ALD5 COM2 SPI1 YER152C PET122 GYP8 HSP12 PES4 PHO4 HXK1 IRC7 ADE5,7 STR3 GPG1 MF(ALPHA)2 AGA2 CTT1 TPO2 YGR139W CYS4 RTS3 YHB1 RIE1 YGR259C TNA1 SLT2 HXT4 ANS1 SPL2 YHR140W SPO16 PHO12 IMD2 YHR217C OPT1 ASG7 YJL118W VTC4 ANB1 BNA2 HMS2 BAT2 THI11 PTK1 STE3 PIR3 HAP4 CWP1 MAE1 YLL066C SH…
Cad1p	0.1521	0.1046	2.18993e-07	YBR116C YBR285W PHO89 CIT2 YCR018C-A PRR2 PHM6 YDR340W ATO3 YDR417C YEL045C YER152C HSP12 ADE5,7 RTS3 PHO81 YHB1 SLT2 SPL2 ARO9 YIL100W ASG7 ANB1 BAT2 HAP4 MAE1 MTD1 YLL066C SHM2 GAS2 GMC2 PAU4 HXT2 ADE17 GAT2 ALD3 SIP18 TDA1 FET4 AAH1 NDJ1 GPD2 DDR2 YOL013W-A SER1 ATP15 RTC6 MFM1 YPL025C PDH1 YPR002C-A ATP20 ADE1 FUI1 YBR012C ZTA1 HSP26 ARG3 YMR050C
Mga1p	0.2113	0.0923	2.47687e-07	YAL064W PHO5 YBR134W LEU2 YDL241W KNH1 STP4 YDR034C-A VTC5 HSP42 YDR274C PHM6 ARO10 ATO3 YDR442W MFA1 DSF1 VTC1 SPI1 GYP8 HSP12 IRC7 AGA2 RME1 CTT1 CLB6 YGR139W BTN2 RTS3 RIE1 TNA1 YGR273C YHR022C HXT4 SPL2 ARO9 SPO16 SGA1 RGI2 BAR1 OPT1 ASG7 BAT2 THI11 PIR3 HAP4 CWP1 YKR075C PDC5 YLR297W CIS1 PAU4 AIM34 PLB2 GAT2 SIP18 RGM1 YMR306C-A FET4 NCE103 YNL018C NRM1 ZEO1 DDR2 RAS1 LAS17 FDH1 HSP33 YPL27…
Ash1p	0.0979	0.1238	4.64424e-07	PHO5 LYS2 PHO89 GFD2 PAU3 PST1 PHM6 YDR442W MFA1 PHO8 STR3 AGA2 SPL2 PHO12 YIL100W SGA1 BAR1 BAT2 PIR3 CWP1 AFB1 VRP1 AAC1 YMR304C-A SCW10 YMR306C-A RPL18B HSP82 YPL205C SSU1 ATP4 SKS1 YPL025C RMI1 ECM23 ECM13 REG2 ARG3
Rgm1p	0.1546	0.1017	4.69935e-07	HSP30 HMRA1 PAU3 STP4 PST1 YDR274C MFA1 SPI1 YER152C PAU5 HSP12 HXK1 PAU11 GPG1 CTT1 TPO2 YGR139W RTS3 YHB1 RIE1 SLT2 HXT4 TRA1 ARO9 SGA1 BAR1 SAG1 BAT2 PTK1 HAP4 CWP1 YLL066C YEH1 YLR030W PDC5 YLR297W GAS2 PAU4 TSL1 YMR007W ALD3 RGM1 HOR7 YNL338W PPN2 YGP1 NCE103 AAD15 ENB1 ZEO1 NDJ1 SDH5 DDR2 ATP15 GUP2 ATP4 CIP1 PDH1 REG2 YRO2
Rsf2p	0.2268	0.0889	4.76059e-07	YBR285W SPS22 LEU2 YCL001W-A HSP30 PAU3 NRG1 YDR340W SSA4 PHO4 IRC7 YGL262W YGL230C YGL138C ALK1 CTT1 CLB6 YGR139W YHB1 RIE1 YGR265W YGR269W ECM12 YHR022C ERC1 YHR140W CSM2 YIL100W SGA1 REE1 YJL169W YJL028W ANB1 PIR3 HAP4 YKL050C YKL031W ATG10 YLR012C YLR030W YLR076C YLR282C CDA2 YLR311C YLR366W GMC2 AIM34 PLB2 SRT1 YMR119W-A ALD3 GTO3 SCW10 PPN2 YGP1 CUZ1 ALF1 AAH1 YNL034W YNL017C NRM1 ENB1 NDJ1…
Rlm1p	0.1753	0.0962	6.6676e-07	PHO5 YBR116C YBR134W RTC2 YCR018C-A PAU3 THI13 PRR2 KNH1 PST1 HSP42 PHM6 ARO10 YDR417C MFA1 DSF1 ALD5 SPI1 HSP12 HXK1 YGL230C GPG1 CTT1 TPO2 RTS3 SLT2 ARO9 PHO12 YHR217C HMS2 YJR157W PIR3 CWP1 MAE1 AFB1 ATG39 VRP1 PHO84 TSL1 PLB2 SPG4 ALD3 SIP18 YNL338W RPL18B YGP1 AAH1 YNL058C YNL034W PAU20 ZEO1 SDH5 DDR2 RKI1 LAS17 MCH5 PUT4 GRE1 FLC1 GPH1 YAR053W PHO11 ECM13 FIG1 GIP1 REG2 HSP26 PRY1
Mss11p	0.1546	0.099	1.18478e-06	PHO5 PHO89 CHA1 LEU2 YDL241W VTC5 PHO8 PAC11 DSF1 PET122 PHO4 FHN1 BTN2 HXT4 TRA1 BAR1 REE1 OPT1 ASG7 YJL118W PTK1 PIR3 HAP4 CWP1 YEH1 AFB1 SHM2 YLR076C IMD4 YMR007W HXT2 RGM1 GTO3 HOR7 YMR321C CUZ1 AAH1 YNL058C NCE103 ZEO1 YOR203W MCH5 HSP82 YPL225W SPO19 TAF14 ATP4 YPL034W SKS1 YPL025C RMI1 ATP20 DIB1 YPR117W YPR196W YAR064W YAR066W FUI1 YBR219C LYS20
Rds1p	0.0851	0.1264	1.48072e-06	YBR134W HSP30 YCR041W THI13 STP4 PST1 DIT1 SPI1 TPO2 YGR139W RIE1 YKL177W SHM2 YLR297W TSL1 GAT2 TDA1 YMR321C YNL338W YGP1 YOL166C AAD15 IZH4 HST3 HSP82 POS5 SSU1 ECM23 CIP1 QCR2 CDS1 YRO2 HSP26
Tos8p	0.1366	0.1025	1.71968e-06	PHO5 PHO89 SPS22 HMRA1 YCR102W-A KNH1 STP4 PST1 MFA1 THI5 STE2 HXT10 YFR054C AGA2 CTT1 CLB6 TPO2 YGR139W RTS3 ANS1 SGA1 BAR1 ASG7 VTC4 ANB1 BAT2 YJR157W CWP1 YLL066C YLR297W CIS1 PAU4 HXT2 GAT2 SIP18 YNL338W THI12 MFA2 PAU20 IZH4 YOL013W-A RAS1 LAS17 WTM2 YOR385W FDH1 GRE1 CIP1 YPR002C-A YAR066W YRO2 AAC3 YPR108W-A
Ecm22p	0.1727	0.0938	1.99687e-06	PHO5 ADH5 PHO89 CHA1 PAU3 NRG1 PHO8 SSA4 SPI1 GYP8 PAU5 HSP12 PAU11 YGL138C GPG1 AGA2 ALK1 SPR3 FHN1 YHB1 SPO16 PHO12 BAR1 ANB1 YEH1 YLR030W YLR162W YLR297W ACO1 GAS2 PAU4 HUG1 AIM34 YMR119W-A RGM1 TDA1 YGP1 ALF1 NCE103 YNL017C NRM1 PAU20 ENB1 NDJ1 HST3 HSP33 HSP82 FLC1 GUP2 ATP4 SRL4 AEP3 ROX1 SUE1 YPR196W BDH1 LDS1 SSA1 YAR064W PHO11 CDS1 ZTA1 YRO2 HSP26 PRY1 IRC18 YNL146C-A
Stb5p	0.2294	0.0857	2.09739e-06	PHO5 ADH5 HMLALPHA1 CHA1 LEU2 YCR018C-A MATALPHA1 YCR041W HMRA1 YCR097W-A KNH1 STP4 YDR034C-A PST1 HSP42 PHM6 YDR340W ARO10 ATO3 MFA1 ALD5 YER084W STE2 HSP12 HXK1 MIG2 STR3 MF(ALPHA)2 AGA2 RME1 BTN2 RIE1 HXT4 SGA1 RGI2 BAR1 YJL118W SAG1 TDA4 BAT2 STE3 YKL177W HAP4 CWP1 MTD1 YLR030W AFB1 CDA1 GAS2 PHO84 HUG1 PLB2 RGM1 HOR7 TDA1 FET4 YNL058C YOL166C ZEO1 YOL013W-A RKI1 LEU9 ATG40 SER1 WTM2 PUT4 YPL…
Cst6p	0.5258	0.0689	2.42061e-06	YAL066W PHO5 YBR116C ADH5 YBR285W PHO89 HMLALPHA1 CHA1 SPS22 YCL001W-A CIT2 YCR018C-A PET18 MATALPHA2 MATALPHA1 HMRA1 YCR097W-A PAU3 YDL241W YDL186W YDR157W HSP42 PHM6 ARO10 DIT1 YDR442W MFA1 PHO8 PAC11 FCY2 ALD5 SPI1 YER152C BUR6 YER188W COS4 THI5 STE2 YFL019C HSP12 HXK1 IRC7 ADE5,7 YGL230C YGL204C TPN1 STR3 YGL138C GPG1 YGL088W AGA2 ALK1 SPR3 CTT1 TPO2 CYS4 RTS3 YHB1 RIE1 YGR259C TNA1 YGR265W Y…
Stp4p	0.0644	0.142	2.6044e-06	YCR018C-A HSP30 YDR034C-A PST1 YDR340W SPI1 TPO2 YGR139W RIE1 BAT2 YLR297W YLR416C TSL1 HXT2 YMR119W-A GAT2 YGP1 IZH4 MGR2 HST2 CIP1 YPR002C-A ROX1 YRO2 YMR050C
Arr1p	0.2345	0.0845	2.86496e-06	PHO5 YBR116C PHO89 CIT2 PET18 MATALPHA2 MATALPHA1 YCR041W HMRA1 THI13 YDL241W YDR034C-A NRG1 YDR157W ARO10 DSF1 ALD5 MAM1 THI5 PAU5 HXK1 IRC7 YGL230C MIG2 GPG1 ALK1 BTN2 YHB1 YGR265W YHR022C HXT4 ANS1 SPL2 PHO12 RNR3 RGI2 OPT1 BAT2 THI11 HAP4 YKL050C YKR075C MTD1 ATG10 YLR012C YLR076C PHO84 IMD4 PLB2 HXT2 AAC1 YMR119W-A ADE17 GAT2 TDA1 SCW10 THI12 CUZ1 NCE103 NRM1 PAU20 NDJ1 SPO21 HST3 SER1 SPR2 …
Rgt1p	0.1211	0.1051	3.1957e-06	ADH5 HMLALPHA1 LEU2 MATALPHA1 HMRA1 MFA1 ALD5 YER152C STE2 MIG2 MF(ALPHA)2 AGA2 CYS4 RIE1 HXT4 IMD2 SGA1 BAR1 SAG1 TDA4 BAT2 STE6 STE3 YKL177W PIR3 YKR075C AFB1 GAS2 IMD4 PLB2 HXT2 AAC1 YMR057C YMR304C-A SCW10 YNL058C ZEO1 WTM2 HES1 MCH5 MF(ALPHA)1 SSU1 SRL4 VTC3 YPR015C YAR053W REG2
Yap3p	0.0979	0.1134	4.24164e-06	PHO5 ADH5 HMLALPHA1 LEU2 MATALPHA1 YCR041W HMRA1 YCR097W-A PHM6 YDR340W MFA1 ALD5 STE2 PAU11 MF(ALPHA)2 AGA2 RME1 SPL2 BAR1 SAG1 BAT2 STE6 STE3 YKL177W AFB1 GAS2 YLR416C ALD3 YMR304C-A MFA2 YNL058C ATG40 WTM2 MF(ALPHA)1 VTC3 YPR015C RDS3 FIG1
Urc2p	0.0902	0.1159	5.91051e-06	PHO5 YCR018C-A HSP30 STP4 YDR034C-A PST1 PHM6 YDR340W PHO8 GYP8 TPO2 YGR139W RIE1 ARO9 PHO12 BAT2 MTD1 YLR297W CDA2 YLR416C GTO3 YMR321C YNL338W YGP1 YOL013W-A GUP2 MF(ALPHA)1 SKS1 HST2 CIP1 YPR002C-A YPR117W PHO11 FUI1 FUR4
Pdr3p	0.9124	0.059	7.06269e-06	YAL066W YAL064W PHO5 LYS2 YBR116C YBR134W ADH5 RTC2 YBR285W PHO89 HMLALPHA1 CHA1 SPS22 GFD2 HBN1 LEU2 YCL001W-A CIT2 YCR018C-A PET18 HSP30 MATALPHA2 MATALPHA1 YCR041W HMRA1 YCR097W-A YCR102W-A PAU3 THI13 YDL241W PRR2 YDL186W KNH1 YDR034C-A NRG1 PST1 VTC5 YDR157W HSP42 UPS3 YDR274C PHM6 YDR340W ARO10 ATO3 DIT1 YDR417C MFA1 PHO8 PAC11 IZH1 DSF1 YEL045C FCY2 YER066C-A VTC1 ALD5 YER084W RAD51 SSA4 MA…
Oaf1p	0.2036	0.0858	8.25075e-06	PHO5 YBR116C YBR174C SPS22 CIT2 KNH1 STP4 PHM6 ATO3 IZH1 VTC1 SSA4 COM2 HSP12 IRC7 TOS3 CTT1 CLB6 TPO2 RTS3 TNA1 YHR140W PHO12 SGA1 RGI2 BAT2 PIR3 HAP4 MTD1 YLR162W TSL1 AIM34 AAC1 SPG4 GAT2 ALD3 SIP18 HOR7 TDA1 SCW10 YMR321C YGP1 CUZ1 AAH1 ZEO1 IZH4 DDR2 PLB3 RAS1 ATG40 SER1 WTM2 PUT4 HSP33 GRE1 GUP2 TAF14 SSU1 YPL034W SKS1 YPL025C RMI1 HST2 CIP1 AEP3 ROX1 SUE1 TPO3 YPR196W ADE1 PHO11 ECM13 YRO2…
Swi5p	0.1289	0.0982	1.14152e-05	ADH5 HMLALPHA1 LEU2 MATALPHA1 HMRA1 YCR097W-A PST1 MFA1 ALD5 MAM1 COS4 STE2 HSP12 MF(ALPHA)2 AGA2 RME1 PHO81 YHB1 YGR273C SPL2 BAR1 REE1 SAG1 TDA4 BAT2 STE6 STE3 YKL177W PIR3 YLL066C YLR012C AFB1 YLR162W GAS2 CIS1 TSL1 GAT2 GTO3 HOR7 YNL338W MFA2 YNL058C ZEO1 WTM2 PUT4 MF(ALPHA)1 SSU1 YPR196W LDS1 CDS1
Nrg2p	0.0464	0.1565	1.17437e-05	RTC2 PHO89 MFA1 HXK1 AGA2 CTT1 SGA1 ASG7 PHO84 AIM34 SDH5 PUT4 ATP15 RTC6 ATP4 ATP20 QCR2 PRY1
Yap7p	0.1624	0.0908	1.23129e-05	ADH5 YBR174C HMLALPHA1 LEU2 YCR018C-A MATALPHA1 HMRA1 YDR034C-A PHM6 YDR340W MFA1 YER152C STE2 PAU5 MF(ALPHA)2 AGA2 CYS4 RTS3 YHB1 YGR259C TNA1 SLT2 HXT4 SPL2 IMD2 RNR3 BAR1 YJL118W SAG1 TDA4 HMS2 BAT2 STE3 YKL177W PIR3 AFB1 YLR297W ACO1 YLR311C GAS2 TSL1 HUG1 PLB2 YMR057C YMR119W-A GTO3 YNL285W YNL058C ZEO1 YOL013W-A RKI1 MCH5 YPL225W FLC1 MF(ALPHA)1 RTC6 YPR002C-A ARR2 LDS1 YAR064W ZTA1 FMP23 A…
Wtm2p	0.0593	0.1361	1.26841e-05	PHO5 HSP30 STP4 PST1 SPI1 TPO2 YGR139W RIE1 SLT2 TDA4 BAT2 MTD1 COX19 YLR297W TSL1 GAT2 TDA1 YGP1 IZH4 WTM2 HST2 CIP1 YRO2
Thi2p	0.1804	0.0875	1.4461e-05	PHO5 ADH5 HMLALPHA1 LEU2 YCR018C-A PET18 MATALPHA1 HMRA1 YCR097W-A THI13 YDL186W PHM6 MFA1 FCY2 THI5 STE2 PES4 GPG1 MF(ALPHA)2 AGA2 CYS4 TNA1 YGR273C ERC1 SPL2 PFS1 BAR1 YJL118W SAG1 TDA4 HMS2 BAT2 THI11 STE6 STE3 YKL177W PIR3 YLL066C AFB1 PDC5 ACO1 GAS2 PHO84 IMD4 AIM34 PLB2 HXT2 ALD3 THI12 YNL285W YNL017C ZEO1 SPO21 SDH5 YOR203W HES1 OSW1 ATP15 YPL225W FLC1 MF(ALPHA)1 RTC6 DPC25 SSU1 ATP20 YAR0…
Fkh1p	0.4691	0.0689	1.66253e-05	PHO5 YBR116C YBR134W ADH5 RTC2 CHA1 HBN1 LEU2 YCL001W-A CIT2 HSP30 MATALPHA2 MATALPHA1 YCR041W YCR064C HMRA1 YCR097W-A KNH1 STP4 YDR034C-A PST1 VTC5 YDR157W HSP42 PHM6 ARO10 ATO3 DIT1 YDR417C PHO8 PAC11 IZH1 YEL045C VTC1 RAD51 SSA4 COM2 BUR6 YER188W STE2 HSP12 PES4 PHO4 HXK1 MIG2 STR3 GPG1 MF(ALPHA)2 YGL088W ALK1 SPR3 CTT1 CLB6 FHN1 TPO2 YGR139W CYS4 RTS3 YHB1 ERC1 HXT4 YHR125W SPL2 PFS1 PHO12 IM…
Mga2p	0.232	0.0812	1.71029e-05	PHO5 YBR116C RTC2 CHA1 CIT2 YDL241W HSP42 YDR274C PHM6 ATO3 YDR417C PHO8 IZH1 FCY2 VTC1 ALD5 SSA4 SPI1 STE2 HSP12 IRC7 STR3 TOS3 AGA2 CTT1 BTN2 RTS3 YHB1 RIE1 TNA1 SPL2 PHO12 IMD2 MGA2 VTC4 TDA4 HMS2 BAT2 THI11 MAE1 MTD1 SHM2 YLR076C ZRT2 ACO1 ATG39 VRP1 PHO84 TSL1 IMD4 AIM34 PLB2 YMR007W SPG4 YMR119W-A ADE17 ALD3 HOR7 TDA1 FET4 YMR321C THI12 RPL18B YGP1 AAH1 YNL058C NCE103 NRM1 IZH4 DDR2 PLB3 RK…
Leu3p	0.1314	0.0953	2.18654e-05	LEU2 YCR018C-A PET18 PHM6 ARO10 VTC1 ALD5 YER152C PAU5 HSP12 STR3 GPG1 AGA2 CTT1 SPL2 ARO9 IMD2 YIL025C REE1 BAT2 PTK1 STE3 MAE1 YKR075C YEH1 SHM2 PDC5 YLR297W CDA1 GAS2 TSL1 AIM34 GAT2 HOR7 TDA1 RPL18B NDJ1 IZH4 DDR2 SER1 MGR2 PDR12 SKS1 RMI1 PDH1 ROX1 GPH1 ARR2 PRY1 YBR219C LYS20
Znf1p	0.0387	0.1667	2.25819e-05	PHO5 HSP12 TPO2 YGR139W RTS3 REE1 BAT2 YLR297W YNL338W YGP1 IZH4 WTM2 CIP1 ADE1 YRO2
Com2p	0.0593	0.1314	2.30153e-05	PHO5 HSP30 PRR2 STP4 PST1 PHM6 PHO8 SPI1 COS4 TPO2 YGR139W RIE1 SPL2 CSM2 YKL050C YLR297W VRP1 TSL1 YMR321C YGP1 IZH4 CIP1 YRO2
Hal9p	0.0799	0.1136	2.79964e-05	PHO89 YCR102W-A STP4 YDR274C PHO8 ALD5 HSP12 MIG2 ALK1 SPR3 YHB1 YGR259C TNA1 MGA2 BAT2 CWP1 PAU4 HXT2 GAT2 TDA1 FET4 PPN2 YGP1 IZH4 GPD2 YOL013W-A IRC13 SSU1 QCR2 YAR053W ECM13
Tbs1p	0.0412	0.1569	3.01576e-05	PHO5 PHM6 HSP12 IRC7 AGA2 SPL2 ARO9 REE1 CWP1 CDA1 HUG1 GAT2 FET4 YGP1 IRC13 LYS20
Aca1p	0.0799	0.1088	6.56432e-05	HMLALPHA1 LEU2 MATALPHA1 YCR041W HMRA1 YCR097W-A MFA1 ALD5 STE2 MF(ALPHA)2 AGA2 PHO81 IMD2 BAR1 SAG1 BAT2 STE6 STE3 YKL177W AFB1 GAS2 IMD4 ALD3 SCW10 YNL058C WTM2 MF(ALPHA)1 SSU1 ATP4 VTC3 LDS1
Pho4p	0.2397	0.0776	7.47559e-05	PHO5 PHO89 CHA1 LEU2 CIT2 KNH1 NRG1 PST1 PHM6 ATO3 YDR417C YDR442W MFA1 PHO8 VTC1 ALD5 SSA4 MAM1 SPI1 PET122 HSP12 HXT10 PHO4 HXK1 YGL138C GPG1 AGA2 CTT1 PHO81 YHB1 YGR273C ERC1 SPL2 ARO9 YHR140W SPO16 PHO12 SGA1 BAR1 ASG7 YJL118W VTC4 SAG1 BNA2 THI11 STE6 CWP1 MAE1 COX19 SHM2 YLR076C ACO1 CDA1 GAS2 CIS1 PHO84 YML122C SRT1 YMR119W-A ADE17 GAT2 ALD3 HOR7 TDA1 YMR304C-A SCW10 YMR321C PPN2 YGP1 MFA2…
Stb3p	0.0206	0.2286	7.55919e-05	PHO5 PHO89 PHM6 SPL2 YNL017C IZH4 HSP82 PHO11
Sdd4p	0.0438	0.1405	8.41355e-05	HSP30 MATALPHA1 STP4 PST1 SPI1 TPO2 YGR139W RIE1 SLT2 YKL031W YLR297W YGP1 ENB1 CIP1 YPR002C-A PHO11 YRO2
Mot2p	0.0438	0.1371	0.000116348	PHO5 CIT2 PHM6 YER152C YER188W TPN1 YGR139W RTS3 BAT2 YKL177W YKL031W YLR297W YLR366W IZH4 FLC1 PDR12 YRO2
Mac1p	0.0979	0.0982	0.000117365	PHO5 PHO89 YCR018C-A HSP30 YDR034C-A PST1 YDR340W MFA1 SPI1 STE2 IRC7 AGA2 CTT1 TPO2 YGR139W RIE1 PHO12 BAR1 REE1 BAT2 ZRT2 YLR297W GAS2 TSL1 RGM1 FET4 RPL18B YGP1 YNL017C NDJ1 WTM2 ATP15 VTC3 CIP1 PDH1 GPH1 SSA1 YRO2
Aro80p	0.1057	0.0956	0.000122573	YBR116C ADH5 HMLALPHA1 LEU2 YCR018C-A MATALPHA1 HMRA1 YCR097W-A HSP42 PHM6 ARO10 MFA1 STE2 MF(ALPHA)2 AGA2 CYS4 SLT2 SPL2 ARO9 YHR140W BAR1 SAG1 TDA4 BAT2 STE6 STE3 YKL177W PIR3 AFB1 GAS2 ZEO1 HES1 ATP15 YPL225W MF(ALPHA)1 RTC6 ATP20 FUI1 CDS1 SIP4 LYS20
Rtg3p	0.1469	0.0852	0.000190754	CIT2 YCR018C-A HSP30 HMRA1 YDL241W NRG1 HSP42 ATO3 PHO8 ALD5 HSP12 IRC7 TPO2 BTN2 SLT2 SPL2 ARO9 REE1 BAT2 MAE1 YKR075C YLR076C ZRT2 ACO1 GAS2 CIS1 YLR416C PHO84 HUG1 ADE17 GAT2 HOR7 YMR321C CUZ1 NCE103 ZEO1 NDJ1 IZH4 SER1 YOR203W MCH5 YOR385W YPL225W TAF14 YPL034W ECM23 PDH1 ATP20 MRP2 SSA1 ADE1 YAR064W ECM13 FUI1 HSP26 ARG3 LYS20
Dal80p	0.0593	0.115	0.000199113	PHO5 PHO89 SPS22 PET18 MATALPHA2 MATALPHA1 YCR041W KNH1 PHM6 ARO10 PHO8 VTC1 SPL2 ARO9 PHO12 BAT2 COX19 ATG39 PAU4 YNL338W MCH5 PUT4 PHO11
Abf1p	0.2861	0.0726	0.000229162	ADH5 CHA1 YCR018C-A HSP30 PAU3 THI13 STP4 YDR034C-A NRG1 YDR157W HSP42 UPS3 YDR340W ARO10 ATO3 DIT1 YDR442W MFA1 PHO8 FCY2 ALD5 SSA4 SPI1 YER181C YER188W COS4 THI5 STE2 HSP12 HXT10 PES4 HXK1 IRC7 ADE5,7 YGL204C TPN1 GPG1 LIF1 AGA2 SPR3 BTN2 YGR259C TNA1 SLT2 ERC1 HXT4 ANS1 ARO9 PHO12 IMD2 BAR1 REE1 OPT1 YJL118W BNA2 TDA4 HMS2 BAT2 STE3 YKL177W PIR3 CWP1 MAE1 AFB1 SHM2 PDC5 YLR162W ACO1 CDA1 GAS2 …
Pip2p	0.2629	0.0737	0.00025579	PHO5 YBR116C ADH5 HMLALPHA1 CHA1 LEU2 HSP30 MATALPHA1 YCR041W HMRA1 YCR097W-A PRR2 STP4 UPS3 PHM6 ATO3 MFA1 IZH1 FCY2 VTC1 ALD5 SSA4 COM2 YER152C STE2 PAU5 HSP12 MF(ALPHA)2 YGL088W AGA2 RME1 CTT1 BTN2 CYS4 YGR259C TNA1 SLT2 ERC1 ANS1 SPL2 YHR140W PHO12 IMD2 YIL100W RNR3 RGI2 BAR1 SAG1 TDA4 HMS2 BAT2 STE6 STE3 YKL177W PIR3 HAP4 AFB1 PDC5 ACO1 VRP1 GAS2 PHO84 IMD4 AIM34 PLB2 HXT2 YMR057C GAT2 ALD3 …
YPR196W	0.0515	0.1198	0.000260232	PHO5 HSP30 STP4 PST1 PAC11 SPI1 TPO2 YGR139W RIE1 MTD1 YLR297W TSL1 GAT2 YGP1 IZH4 HST3 TAF14 CIP1 YRO2 HSP26
Pdc2p	0.0155	0.24	0.000272521	PET18 THI13 THI5 THI11 PDC5 THI12
Tup1p	0.4562	0.0662	0.000307309	YAL064W PHO5 YBR116C YBR134W ADH5 YBR285W PHO89 HMLALPHA1 CHA1 YCL001W-A YCR018C-A PET18 YCR097W-A PAU3 YDL241W PRR2 KNH1 STP4 YDR034C-A NRG1 VTC5 UPS3 PHM6 YDR340W ARO10 ATO3 DIT1 MFA1 PHO8 YEL045C FCY2 VTC1 ALD5 SSA4 SPI1 YER152C PET122 YER188W COS4 STE2 PAU5 YFL019C HSP12 HXT10 IRC7 YGL262W PAU11 ADE5,7 YGL204C AGA2 SPR3 YGR139W CYS4 RTS3 YHB1 RIE1 YGR259C TNA1 YGR265W ECM12 YHR022C SLT2 ERC1 …
Tbf1p	0.116	0.0888	0.000343847	YBR134W YDL241W NRG1 PAC11 TOS3 MF(ALPHA)2 YGL088W SPR3 YHR140W IMD2 YHR217C CSM2 RGI2 MGA2 HAP4 MTD1 YLL066C YEH1 ZRT2 YLR149C-A YLR297W ATG39 YLR366W PAU4 HUG1 IMD4 YMR013W-A TDA1 SCW10 FET4 YNL338W ENB1 ZEO1 GPD2 SER1 GUP2 YPL062W YPL025C SSA1 FUI1 YRO2 YER053C-A YHL048C-A DPI8 YLL066W-B
Gal4p	0.2345	0.0742	0.000462433	PHO5 ADH5 HMLALPHA1 LEU2 YCR018C-A MATALPHA1 HMRA1 YCR097W-A PAU3 YDR034C-A PST1 PHM6 YDR340W MFA1 FCY2 YER152C STE2 HXT10 ADE5,7 MF(ALPHA)2 AGA2 CYS4 RTS3 YHB1 YGR259C TNA1 ERC1 SPL2 IMD2 RNR3 RGI2 BAR1 REE1 YJL118W SAG1 TDA4 HMS2 BAT2 STE6 PTK1 STE3 YKL177W PIR3 CWP1 YKL031W YLL066C YLR030W AFB1 SHM2 YLR076C YLR162W ACO1 GAS2 PAU4 PHO84 TSL1 IMD4 AIM34 PLB2 HXT2 ADE17 ALD3 RGM1 SCW10 YNL338W YN…
Opi1p	0.0902	0.0933	0.00055278	YBR116C ADH5 KNH1 YDR274C PHO8 SPI1 STE2 YGL230C MIG2 FHN1 PHO81 YHB1 YGR259C TNA1 HXT4 STE3 CWP1 USB1 ACO1 PHO84 AAH1 ENB1 ZEO1 IZH4 GPD2 WTM2 MCH5 POS5 SKS1 VTC3 PDH1 CDS1 ZTA1 PRY1 YBR219C
Rph1p	0.1495	0.0812	0.000594742	PHO5 YBR285W CHA1 THI13 YDL241W STP4 YDR157W PHM6 MFA1 YGL262W ADE5,7 AGA2 CTT1 FHN1 BTN2 SPL2 ARO9 YHR140W PHO12 BNA2 THI11 PIR3 YLR030W YLR297W ACO1 CDA2 CIS1 YLR416C YLR446W TSL1 HXT2 SPG4 RGM1 YMR321C THI12 YGP1 MFA2 YNL034W ENB1 NDJ1 SDH5 ATG40 MCH5 YPL277C HSP82 GRE1 RTC6 HST2 CIP1 SUE1 TPO3 GPH1 PHO11 FMP23 HSP26 SIP4 PRY1 DPI8
Pdr8p	0.0258	0.1538	0.000669152	PHO5 PHO89 PHO8 CTT1 BAT2 YNL017C HSP82 MF(ALPHA)1 GPH1 PHO11
Spt2p	0.0335	0.1287	0.0010519	VTC1 HSP12 CTT1 SPL2 PHO12 VTC4 PIR3 YNL034W ZEO1 MF(ALPHA)1 PHO11 ZTA1 YRO2
Cup9p	0.2062	0.0735	0.00140395	ADH5 HMLALPHA1 LEU2 YCR018C-A MATALPHA1 YCR041W HMRA1 YCR097W-A YDR034C-A PHM6 YDR340W ATO3 YDR442W MFA1 DSF1 FCY2 STE2 ADE5,7 MF(ALPHA)2 AGA2 SPR3 CYS4 YHB1 YGR259C TNA1 ERC1 SPL2 IMD2 YIL100W SGA1 RNR3 BAR1 YJL118W SAG1 TDA4 HMS2 YJR157W STE6 PTK1 STE3 YKL177W PIR3 YLL066C YLR030W AFB1 SHM2 PDC5 ACO1 GAS2 YLR416C PHO84 IMD4 AIM34 PLB2 HXT2 ADE17 RGM1 SCW10 YNL285W CUZ1 YNL058C ZEO1 SPO21 SDH5 P…
Cha4p	0.0567	0.1019	0.0014531	PHO5 HMLALPHA1 CHA1 MATALPHA2 MATALPHA1 YCR041W PST1 ARO10 YER181C GPG1 RIE1 ARO9 YKL177W YLR366W YMR119W-A YMR321C YGP1 ALF1 PAU20 MCH5 BDH1 YRO2
Rtg2p	0.0052	0.4	0.00146988	CIT2 ACO1
War1p	0.0258	0.1351	0.00201419	PHO5 SPL2 ARO9 BAT2 YKL050C YLR297W SRT1 ALD3 PDR12 ROX1
Uga3p	0.0747	0.0912	0.00209076	PHO5 YBR174C YCR018C-A MATALPHA2 MATALPHA1 YCR041W YDL241W HSP42 PHM6 PHO8 ALD5 TPO2 BTN2 RTS3 PHO12 RNR3 MAE1 GAS2 YMR321C YNL338W ZEO1 RKI1 YOR203W YOR385W TAF14 YPL034W PHO11 FUI1 HSP26
Dal81p	0.0851	0.0878	0.002199	PHO5 CHA1 LEU2 YDL241W HSP42 PHM6 PHO8 YEL045C ALD5 HXK1 BTN2 CYS4 RTS3 PHO12 MGA2 OPT1 BAT2 YLR030W ACO1 AAC1 GAT2 YMR321C YOL013W-A YOR385W MF(ALPHA)1 HST2 PHO11 FUI1 HSP26 SIP4 ARG3 LYS20 YNL146C-A
YJL206C	0.0464	0.1047	0.00242457	PHO5 PHM6 YEL045C YER152C YGL262W SPL2 PHO12 IMD2 YKL177W PAU4 TDA1 FDH1 YPL278C YPL277C HST2 CIP1 YBR012C YBR219C
Hcm1p	0.0954	0.0845	0.00257233	PHO5 YCR018C-A THI13 YDL186W VTC5 HSP12 HXK1 MIG2 AGA2 CTT1 RIE1 TRA1 SPL2 YHR140W BAR1 BNA2 BAT2 THI11 YJR157W YLL066C YLR297W PAU4 AIM34 YNL338W NRM1 AAD15 PAU20 GPD2 OSW1 YPL277C RRD2 DPC25 SSU1 YPR002C-A ATG11 YAR064W HSP26
Haa1p	0.134	0.0777	0.00293563	HSP30 STP4 NRG1 HSP42 PHM6 YDR417C VTC1 SSA4 COM2 SPI1 YER188W TOS3 GPG1 YGL088W CTT1 FHN1 TPO2 RIE1 SPL2 ARO9 BAR1 ANB1 BAT2 YKR075C YLR297W GAS2 CIS1 TSL1 PPN2 YGP1 AAD15 NDJ1 IZH4 DDR2 PLB3 MCH5 ATP15 HSP82 GRE1 RTC6 MGR2 PDR12 SKS1 CIP1 PDH1 ATP20 TPO3 ECM13 YPK3 YRO2 HSP26 PRY1
Yap1p	0.8918	0.0573	0.00294536	YAL066W YAL064W PHO5 LYS2 YBR116C YBR134W ADH5 RTC2 YBR174C YBR285W PHO89 HMLALPHA1 CHA1 SPS22 GFD2 HBN1 YCL001W-A CIT2 YCR018C-A PET18 HSP30 MATALPHA2 MATALPHA1 YCR064C HMRA1 YCR097W-A PAU3 THI13 YDL241W PRR2 KNH1 STP4 YDR034C-A NRG1 PST1 VTC5 YDR157W HSP42 UPS3 YDR274C PHM6 YDR340W ARO10 ATO3 DIT1 YDR417C MFA1 PHO8 PAC11 IZH1 DSF1 YEL045C FCY2 VTC1 ALD5 YER084W RAD51 SSA4 MAM1 COM2 SPI1 YER152C…
Fzf1p	0.0515	0.098	0.00347287	PHO5 YFR054C CTT1 YGR139W RTS3 YHB1 BAT2 YKL177W YLR297W CDA1 YLR416C YMR321C IZH4 WTM2 SSU1 YPL034W VTC3 CIP1 LDS1 YRO2
Tog1p	0.0541	0.0963	0.00358507	HSP30 PST1 PHM6 SPI1 TPO2 YGR139W RIE1 SPL2 BAT2 YLR297W GAS2 TSL1 GAT2 PPN2 MER1 YGP1 IZH4 WTM2 CIP1 YRO2 YBR219C
Lys14p	0.0052	0.2857	0.00473917	LYS2 LYS20
Rsc30p	0.0644	0.088	0.00604663	YBR285W PHO89 SPS22 CIT2 MATALPHA2 DIT1 MFA1 SSA4 COS4 HSP12 YHB1 TRA1 SPO16 RGI2 OPT1 ASG7 HOR7 AAH1 ENB1 LEU9 HSP33 HSP82 ATP20 BDH1 SSA1
Rpi1p	0.0438	0.0977	0.00626106	PHO5 HSP30 YCR102W-A PST1 SPI1 FHN1 TPO2 YGR139W RIE1 BAT2 YLR297W TSL1 GAT2 IZH4 YOR385W CIP1 YRO2
Lap3p	0.0129	0.1562	0.00675328	PHO5 HXT10 RGI2 YKL031W SCW10
Eds1p	0.0361	0.1029	0.0068021	IRC7 RTS3 BAT2 YKL177W MAE1 ACO1 HXT2 ADE17 MCH5 FDH1 YPL034W ADE1 YAR053W LYS20
Aft2p	0.0979	0.0782	0.00851983	PHO5 YBR116C YBR134W PHO89 PHM6 YDR442W IZH1 DSF1 RAD51 HSP12 PAU11 CTT1 FHN1 BTN2 RTS3 TRA1 SPL2 PHO12 YIL100W BNA2 YKR075C PAU4 AAC1 HOR7 CUZ1 AAH1 NCE103 PAU20 ENB1 IZH4 SPO19 ATP4 YPL034W SUE1 PHO11 FUI1 ZTA1 PRY1
Ure2p	0.0052	0.2222	0.0104826	CIT2 BAT2
Hap3p	0.0644	0.0839	0.0110645	PHO5 LEU2 MATALPHA2 YCR041W PHM6 YDR442W VTC1 RAD51 HSP12 PES4 YGR139W YHB1 SPL2 PHO12 BNA2 BAT2 YLR297W YNL338W SPO21 SER1 ATP15 VTC3 ATP20 QCR2 YAR053W
Ert1p	0.0515	0.0873	0.0127164	PHO5 YBR116C PHM6 RTS3 PHO12 HAP4 MAE1 SHM2 HXT2 ADE17 CUZ1 ALF1 AAH1 YNL058C IZH4 HSP82 ATP4 ADE1 PHO11 SPO24
Msn1p	0.0619	0.0836	0.0128356	PHO5 YCR097W-A YDR157W PHM6 MFA1 VTC1 HSP12 AGA2 CTT1 RTS3 SPL2 ARO9 PHO12 HMS2 YKL050C YLR012C HSP82 SKS1 DIB1 YAR064W PHO11 FUI1 FUR4 FMP23
Mig2p	0.0644	0.0828	0.0129982	PHO5 YBR285W PHO89 YDL241W IZH1 DSF1 SSA4 HXK1 MF(ALPHA)2 BTN2 HXT4 OPT1 SAG1 ATG39 HXT2 FET4 NDJ1 YOR203W MF(ALPHA)1 RTC6 ATP4 YPR196W PHO11 ECM13 FUI1
Rim101p	0.2938	0.0642	0.0161518	PHO5 LYS2 PHO89 CHA1 HBN1 CIT2 YCR018C-A HSP30 YDL241W PRR2 KNH1 NRG1 PST1 VTC5 HSP42 YDR274C PHM6 ARO10 DIT1 YDR442W MFA1 PHO8 IZH1 DSF1 FCY2 ALD5 COM2 SPI1 BUR6 GYP8 PHO4 HXK1 ADE5,7 STR3 MF(ALPHA)2 AGA2 RME1 BTN2 YHB1 TNA1 SLT2 SPL2 YHR140W PHO12 YIL100W SGA1 RNR3 BAR1 MGA2 YJL118W SAG1 ANB1 BAT2 STE3 CWP1 YKR075C AFB1 USB1 ACO1 CIS1 GMC2 PHO84 PLB2 GAT2 HOR7 YMR304C-A SCW10 FET4 YMR321C YNL28…
Stb4p	0.0232	0.1059	0.0164165	PHO5 PHM6 YER066C-A RTS3 BAT2 PAU4 WTM2 ZTA1 FMP23
Msa2p	0.0026	0.25	0.0164485	HSP12
Yrm1p	0.0052	0.1818	0.0189862	RTS3 HMS2
Tod6p	0.0258	0.1	0.0193989	STP4 TPO2 YGR139W BTN2 YLR297W IZH4 WTM2 CIP1 YRO2 YBR219C
Azf1p	0.0438	0.0867	0.0199233	PHO5 PHO89 DIT1 ANS1 SGA1 RNR3 YKL050C YLL066C RGM1 GTO3 SCW10 FET4 NRM1 MCH5 SKS1 PHO11 SIP4
Sut2p	0.0412	0.086	0.0242666	PHO5 PRR2 FHN1 YGR139W ARO9 PHO12 BAT2 HAP4 CWP1 YLR297W CDA1 GAT2 IZH4 SSU1 ATP4 PHO11
Dot6p	0.0361	0.0881	0.0258229	PHO5 YGR139W YLR297W YLR416C SIP18 TDA1 YMR321C MER1 YGP1 WTM2 YPL034W LDS1 ADE1 FUI1
Pul4p	0.0155	0.1111	0.0259401	RIE1 SPL2 CSM2 BAT2 YLR297W SSU1
Reb1p	0.1778	0.0661	0.0325271	RTC2 CHA1 CIT2 HMRA1 YDL186W STP4 YDR157W HSP42 YER066C-A VTC1 ALD5 RAD51 MAM1 SPI1 HSP12 IRC7 MF(ALPHA)2 YGL088W YHB1 RIE1 YGR259C TNA1 SLT2 SPO16 PHO12 CSM2 REE1 ANB1 HMS2 PTK1 YEH1 SHM2 YLR162W YLR297W ACO1 CDA2 YLR366W YMR119W-A ALD3 RGM1 HOR7 RPL18B YGP1 YNL058C YNL034W YNL018C SDH5 DDR2 RAS1 YOR102W ATG40 YOR203W HES1 YOR385W HSP82 YPL225W GRE1 ATP4 PDH1 YPR002C-A BDH1 YBR012C FUR4 ZTA1 YRO…
Arg80p	0.0747	0.0734	0.0382353	YCR018C-A HSP30 STP4 PST1 SPI1 LIF1 TPO2 YGR139W RIE1 ARO9 SAG1 BAT2 YEH1 YLR297W GAS2 TSL1 GAT2 YGP1 NDJ1 HST3 ATG40 WTM2 ATP15 CIP1 YBR012C YPK3 YRO2 SIP4 ARG3
Pex2p	0.0026	0.1667	0.0382407	RNR3
Smp1p	0.0567	0.0761	0.0417223	PHO89 PAU3 PHM6 VTC1 ALD5 SPR3 YHR022C SLT2 SPL2 MGA2 PIR3 CWP1 YLL066C YLR162W PAU4 GTO3 FET4 YNL338W PAU20 VTC3 YAR066W YPL060C-A
Hms2p	0.0258	0.0885	0.0427516	PHO5 PHO89 PHM6 SPL2 HMS2 BAT2 STE3 YLR297W IZH4 PDH1
Ndd1p	0.0258	0.0885	0.0427516	YCR064C ALK1 TRA1 MFA2 YNL058C YNL034W HST3 SUE1 GPH1 PRY1
YKL222C	0.0155	0.1	0.0429675	PHO5 PHO89 PHM6 CLB6 BAT2 YLR297W
Gal80p	0.0258	0.087	0.0475697	PHO5 PHM6 HXT10 RGI2 YKL031W SCW10 YMR321C IZH4 WTM2 FUR4

## Sheet: GO analysis
GOID	TERM	NUM_LIST_ANNOTATIONS	LIST_SIZE	CLUSTER_FREQUENCY	TOTAL_NUM_ANNOTATIONS	POPULATION_SIZE	GENOME_FREQUENCY	ANNOTATED_GENES
GO:0006366	transcription by RNA polymerase II	147	162	0.9074	524	6420	0.0816	YAL051W, YBL021C, YBL054W, YBL103C, YBR033W, YBR049C, YBR066C, YBR083W, YBR150C, YBR182C, YBR239C, YBR240C, YCL055W, YCR065W, YCR084C, YCR106W, YDL048C, YDL056W, YDL106C, YDL170W, YDR034C, YDR043C, YDR081C, YDR096W, YDR146C, YDR169C, YDR207C, YDR213W, YDR216W, YDR259C, YDR421W, YDR423C, YDR451C, YDR463W, YDR520C, YER028C, YER040W, YER045C, YER068W, YER088C, YER111C, YER130C, YER161C, YER169W, YER…
GO:0042221	response to chemical	60	162	0.3704	523	6420	0.0815	YBL005W, YBL021C, YBL103C, YBR066C, YBR239C, YCL055W, YCR065W, YCR084C, YCR106W, YDL170W, YDR043C, YDR169C, YDR207C, YDR213W, YDR216W, YDR423C, YER028C, YER040W, YER130C, YFL031W, YFL052W, YGL035C, YGL166W, YGL209W, YGL252C, YHL020C, YHL027W, YHR084W, YHR178W, YHR206W, YIL036W, YIL101C, YIR018W, YIR023W, YIR033W, YJL110C, YKL032C, YKL062W, YKL109W, YKR034W, YLR256W, YML007W, YMR037C, YMR280C, YNL…
GO:0006325	chromatin organization	24	162	0.1481	306	6420	0.0477	YCR084C, YDL106C, YDR096W, YDR207C, YDR216W, YDR310C, YER088C, YER161C, YER169W, YFR034C, YHR056C, YIL131C, YIR018W, YIR033W, YKL020C, YKL062W, YKL112W, YKL185W, YLR223C, YMR037C, YNL216W, YOR229W, YPL075W, YPL128C
GO:0006520	cellular amino acid metabolic process	13	162	0.0802	216	6420	0.0336	YDL106C, YDL170W, YDR034C, YDR421W, YIL101C, YIR023W, YKL015W, YLR098C, YLR451W, YMR042W, YMR043W, YNL103W, YNL239W
GO:0000278	mitotic cell cycle	12	162	0.0741	366	6420	0.057	YDL056W, YDR146C, YDR451C, YER111C, YGL071W, YGR044C, YIL131C, YKL185W, YKR077W, YLR131C, YML027W, YOR372C
GO:0007124	pseudohyphal growth	12	162	0.0741	74	6420	0.0115	YBR066C, YBR083W, YDR043C, YDR207C, YGR249W, YHR084W, YIL131C, YJR147W, YKL043W, YKL185W, YMR016C, YOR032C
GO:0006979	response to oxidative stress	10	162	0.0617	129	6420	0.0201	YCR065W, YER130C, YHR178W, YHR206W, YIL101C, YKL062W, YML007W, YMR037C, YOR162C, YPL202C
GO:0042594	response to starvation	9	162	0.0556	78	6420	0.0121	YBR239C, YER130C, YFR034C, YGL035C, YGL071W, YGL209W, YKL062W, YMR037C, YPL202C
GO:0006629	lipid metabolic process	9	162	0.0556	346	6420	0.0539	YAL051W, YDR096W, YDR123C, YGL071W, YHL020C, YMR070W, YOL108C, YOR363C, YPL202C
GO:0051321	meiotic cell cycle	8	162	0.0494	322	6420	0.0502	YCL055W, YDR207C, YFL031W, YGL071W, YGR044C, YHL027W, YHR124W, YOR229W
GO:0005975	carbohydrate metabolic process	8	162	0.0494	253	6420	0.0394	YBR239C, YDR081C, YGL035C, YGL209W, YKL038W, YML051W, YMR280C, YPL248C
GO:0006354	DNA-templated transcription, elongation	7	162	0.0432	107	6420	0.0167	YER068W, YER161C, YER169W, YHR056C, YHR178W, YHR206W, YIL131C
GO:0071554	cell wall organization or biogenesis	5	162	0.0309	298	6420	0.0464	YHL027W, YIL119C, YNL027W, YOR113W, YPL133C
GO:0006970	response to osmotic stress	5	162	0.0309	71	6420	0.0111	YBR066C, YDR043C, YOL089C, YOR028C, YPR065W
GO:0006974	cellular response to DNA damage stimulus	5	162	0.0309	226	6420	0.0352	YCR084C, YER028C, YKL112W, YNL216W, YOR229W
GO:0032787	monocarboxylic acid metabolic process	5	162	0.0309	163	6420	0.0254	YAL051W, YDL170W, YIR023W, YML081W, YOR363C
GO:0006873	cellular ion homeostasis	5	162	0.0309	159	6420	0.0248	YGL071W, YGL166W, YMR021C, YPL202C, YPR008W
GO:0051726	regulation of cell cycle	5	162	0.0309	291	6420	0.0453	YGR044C, YHL027W, YIL131C, YKL185W, YPL089C
GO:0009408	response to heat	4	162	0.0247	60	6420	0.0093	YER111C, YGL073W, YML007W, YMR037C
GO:0045333	cellular respiration	4	162	0.0247	110	6420	0.0171	YBL021C, YKL109W, YLR256W, YOR358W
GO:0033043	regulation of organelle organization	4	162	0.0247	258	6420	0.0402	YGR044C, YIL131C, YOR229W, YPL128C
GO:0051052	regulation of DNA metabolic process	4	162	0.0247	92	6420	0.0143	YDR310C, YIL131C, YKL032C, YPL128C
GO:0051049	regulation of transport	3	162	0.0185	89	6420	0.0139	YGL071W, YGL254W, YPL202C
GO:0006811	ion transport	3	162	0.0185	809	6420	0.126	YGL071W, YGL254W, YPL202C
GO:0006281	DNA repair	3	162	0.0185	299	6420	0.0466	YHR056C, YKL032C, YKL112W
GO:0043934	sporulation	3	162	0.0185	170	6420	0.0265	YAL051W, YDR310C, YHL027W
GO:0001403	invasive growth in response to glucose limitation	3	162	0.0185	54	6420	0.0084	YBR083W, YCR084C, YHR084W
GO:0006352	DNA-templated transcription, initiation	3	162	0.0185	83	6420	0.0129	YBR049C, YIR023W, YMR172W
GO:0048285	organelle fission	3	162	0.0185	271	6420	0.0422	YDR146C, YGL071W, YGR044C
GO:0006260	DNA replication	3	162	0.0185	150	6420	0.0234	YDR310C, YIL131C, YKL112W
GO:0006766	vitamin metabolic process	2	162	0.0123	57	6420	0.0089	YBR240C, YDR081C
GO:0006353	DNA-templated transcription, termination	2	162	0.0123	34	6420	0.0053	YBR049C, YIL131C
GO:0000746	conjugation	2	162	0.0123	113	6420	0.0176	YCL055W, YHR084W
GO:0007031	peroxisome organization	2	162	0.0123	52	6420	0.0081	YDR216W, YJL210W
GO:0006401	RNA catabolic process	2	162	0.0123	157	6420	0.0245	YER068W, YIR033W
GO:0070647	protein modification by small protein conjugation or removal	2	162	0.0123	209	6420	0.0326	YER068W, YNL229C
GO:0032200	telomere organization	2	162	0.0123	91	6420	0.0142	YNL216W, YPL128C
GO:0016570	histone modification	2	162	0.0123	135	6420	0.021	YDR096W, YER169W
GO:0055085	transmembrane transport	2	162	0.0123	457	6420	0.0712	YJL210W, YPL202C
GO:0007005	mitochondrion organization	2	162	0.0123	284	6420	0.0442	YBL103C, YCR065W
GO:0055086	nucleobase-containing small molecule metabolic process	2	162	0.0123	220	6420	0.0343	YDL106C, YDR520C
GO:0000910	cytokinesis	1	162	0.0062	101	6420	0.0157	YHL027W
GO:0006605	protein targeting	1	162	0.0062	244	6420	0.038	YJL210W
GO:0048284	organelle fusion	1	162	0.0062	110	6420	0.0171	YCL055W
GO:0006997	nucleus organization	1	162	0.0062	69	6420	0.0107	YCL055W
GO:0007059	chromosome segregation	1	162	0.0062	222	6420	0.0346	YGL071W
GO:0032196	transposition	1	162	0.0062	114	6420	0.0178	YBR083W
GO:0051603	proteolysis involved in cellular protein catabolic process	1	162	0.0062	262	6420	0.0408	YER068W
GO:0006417	regulation of translation	1	162	0.0062	184	6420	0.0287	YGL073W
GO:0007010	cytoskeleton organization	1	162	0.0062	263	6420	0.041	YCR065W
GO:0006091	generation of precursor metabolites and energy	1	162	0.0062	125	6420	0.0195	YDR081C
GO:0008033	tRNA processing	1	162	0.0062	133	6420	0.0207	YDR463W
GO:0006397	mRNA processing	1	162	0.0062	219	6420	0.0341	YIL131C
GO:0009451	RNA modification	1	162	0.0062	185	6420	0.0288	YCL055W
GO:0006360	transcription by RNA polymerase I	1	162	0.0062	68	6420	0.0106	YBR049C

## Sheet: Sheet3
transcription by RNA polymerase II	response to chemical	chromatin organization	cellular amino acid metabolic process	mitotic cell cycle	pseudohyphal growth	response to oxidative stress	response to starvation	lipid metabolic process	meiotic cell cycle	carbohydrate metabolic process	DNA-templated transcription, elongation	cell wall organization or biogenesis	response to osmotic stress	cellular response to DNA damage stimulus	monocarboxylic acid metabolic process	cellular ion homeostasis	regulation of cell cycle	response to heat	cellular respiration	regulation of organelle organization	regulation of DNA metabolic process	regulation of transport	ion transport	DNA repair	sporulation	invasive growth in response to glucose limitation	DNA-templated transcription, initiation	organelle fission	DNA replication	vitamin metabolic process	DNA-templated transcription, termination	conjugation	peroxisome organization	RNA catabolic process	protein modification by small protein conjugation or removal	telomere organization	histone modification	transmembrane transport	mitochondrion organization	nucleobase-containing small molecule metabolic process	cytokinesis	protein targeting	organelle fusion	nucleus organization	chromosome segregation	transposition	proteolysis involved in cellular protein catabolic process	regulation of translation	cytoskeleton organization
0.9074	0.3704	0.1481	0.0802	0.0741	0.0741	0.0617	0.0556	0.0556	0.0494	0.0494	0.0432	0.0309	0.0309	0.0309	0.0309	0.0309	0.0309	0.0247	0.0247	0.0247	0.0247	0.0185	0.0185	0.0185	0.0185	0.0185	0.0185	0.0185	0.0185	0.0123	0.0123	0.0123	0.0123	0.0123	0.0123	0.0123	0.0123	0.0123	0.0123	0.0123	0.0062	0.0062	0.0062	0.0062	0.0062	0.0062	0.0062	0.0062	0.0062
[truncated: 5 more columns]
